# Supplementary material for: The Proteins of Severe Acute Respiratory Syndrome Coronavirus-2 (SARS CoV-2 or n-COV19), the Cause of COVID-19
Source: Springer Nature journal article supplement (doi:10.1007/s10930-020-09901-4), 2020-05-23
Supplement: 10930_2020_9901_MOESM1_ESM.pdf [file 10930_2020_9901_MOESM1_ESM.pdf]

The Proteins of Severe Acute Respiratory Syndrome Coronavirus-2 (SARS CoV-2  
or n-COV19), the Cause of COVID-19

Supporting Information

Francis K. Yoshimoto\*

(ORC ID: 0000-0002-2308-2999)

Department of Chemistry, The University of Texas at San Antonio (UTSA), San  
Antonio, TX 78249-0698

[francis.yoshimoto@utsa.edu](mailto:francis.yoshimoto@utsa.edu)

*The Protein Journal*, 2020, XXXX, XXXXX

Sequence alignment results presented in Table 4.  
(also for ORF3b and ORF14 sequences)

Readseq version 2.1.30 (12-May-2010) Readseq version 2.1.30 (12-May-2010)

## lalign output for NSP1 SARS COV vs. NSP1 SARS COV2

[EMBnet-Server] Date: Fri May 8 9:18:07 2020

---

```
# bin/lalign36 -E 10.0 -f -12 -g -2 21613.1.seq 21613.2.seq -J -K 3
LALIGN finds non-overlapping local alignments
  version 36.3.5e Nov, 2012(preload8)
Please cite:
  X. Huang and W. Miller (1991) Adv. Appl. Math. 12:373-381
```

```
Query: 21613.1.seq
  1>>>NSP1 SARS CoV 180 bp - 180 aa
Library: 21613.2.seq
  180 residues in      1 sequences
```

```
Statistics: (shuffled [500]) MLE statistics: Lambda= 0.1775; K=0.04078
  statistics sampled from 1 (1) to 500 sequences
Threshold: E() < 10 score: 28
Algorithm: Smith-Waterman (SSE2, Michael Farrar 2006) (7.2 Nov 2010)
Parameters: BL50 matrix (15:-5), open/ext: -12/-2
Scan time: 0.010
```

```
>>NSP1 SARS CoV-2 180 bp (180 aa)
  Waterman-Eggert score: 1023; 266.6 bits; E(1) < 1.8e-76
84.4% identity (93.9% similar) in 180 aa overlap (1-180:1-180)
```

```
      10      20      30      40      50      60
NSP1  MESLVLGVNEKTHVQLSLPVLQVRDVLVRGFGDSVEEALSEAREHLKNGTCGLVELEKGV
      : : : : : : : : : : : : : : : : : : : : : : : : : : : : : : : : : :
NSP1  MESLVPGFNEKTHVQLSLPVLQVRDVLVRGFGDSVEEVLSEARQHLKDGTCGLVEVEKGV
      10      20      30      40      50      60

      70      80      90     100     110     120
NSP1  LPQLEQPYVFIKRSDALSTNHGHKVVVELVAEMDGIQYGRSGITLGVLPVPHVGETPIAYRN
      : : : : : : : : : : : : : : : : : : : : : : : : : : : : : : : : : :
NSP1  LPQLEQPYVFIKRSDARTAPHGHVMVELVAELEGIQYGRSGETLGVLPVPHVGEIPVAYRK
      70      80      90     100     110     120

      130     140     150     160     170     180
NSP1  VLLRKNGNKGAGGHSYGIDLKSYDLGDELGTDPIEDYEQNWNTKHGSGALRELTRELNGG
      : : : : : : : : : : : : : : : : : : : : : : : : : : : : : : : : : :
NSP1  VLLRKNGNKGAGGHSYGADLKSFDLDELGTDPTYEDFQENWNTKHSSGVTRELMRELNGG
      130     140     150     160     170     180
```

```
>--
  Waterman-Eggert score: 42; 15.4 bits; E(1) < 0.53
25.7% identity (55.4% similar) in 74 aa overlap (63-134:15-83)
```

```
      70      80      90     100     110     120
NSP1  QLEQPYVFIKRSDALSTNHGHKVVVELVAEMDGIQYGRSGITLGVLPVPHVGETP-IA YRNV
      : : : . . : : : . : : : : : : : : : : : : : : : : : : : : : :
NSP1  QLSLPVLQVR--DVLVRGFGDSVEEVLSEAR--QHLKDG-TCGLVEVEKGVLPQLEQPYV
```



# LALIGN

[Home](#) | [Contact](#)

Readseq version 2.1.30 (12-May-2010) Readseq version 2.1.30 (12-May-2010)

## lalign output for NSP2 SARS COV vs. NSP2 SARS COV2

[EMBnet-Server] Date: Fri May 8 8:16:55 2020

---

```
# bin/lalign36 -E 10.0 -f -12 -g -2 17255.1.seq 17255.2.seq -J -K 3
LALIGN finds non-overlapping local alignments
  version 36.3.5e Nov, 2012(preload8)
Please cite:
  X. Huang and W. Miller (1991) Adv. Appl. Math. 12:373-381
```

```
Query: 17255.1.seq
      1>>>NSP2 SARS CoV 638 bp - 638 aa
Library: 17255.2.seq
        638 residues in      1 sequences
```

```
Statistics: (shuffled [500]) MLE statistics: Lambda= 0.1778; K=0.02289
  statistics sampled from 1 (1) to 500 sequences
Threshold: E() < 10 score: 38
Algorithm: Smith-Waterman (SSE2, Michael Farrar 2006) (7.2 Nov 2010)
Parameters: BL50 matrix (15:-5), open/ext: -12/-2
Scan time: 0.080
```

```
>>NSP2 SARS CoV-2 638 bp (638 aa)
  Waterman-Eggert score: 3094; 798.9 bits; E(1) < 0
68.3% identity (90.0% similar) in 638 aa overlap (1-638:1-638)
```

```

          10          20          30          40          50          60
NSP2  AVTRYVDNDFGPDGYPLDCIKDFLARAGKSMCTLSEQLDYIESKRGVYCCRDHEHEIAW
      : ::::::::::::::::::::::::::::::: :::::::::::::::::::::::::::::::
NSP2  AYTRYVDNDFGPDGYPLECIKDLLARAGKASCTLSEQLDFIDTKRGVYCCREHEHEIAW
          10          20          30          40          50          60

          70          80          90          100         110         120
NSP2  FTERSDKSYEHQTPFEIKSAKKFDTFKGECPKFVPLNSKVVIQPRVEKKKTEGFMGRI
      .::::::::: ::::::::::: ::::::::::: ::::::::::: .::::::::: .:::::::::
NSP2  YTERSEKSYELQTPFEIKLAKKFDTFNGECPNFVPLNSIIKTIQPRVEKKKLDGFMGRI
          70          80          90          100         110         120

          130         140         150         160         170         180
NSP2  RSVYPVASPQECNNMHLSTLMKCNHCDEVSWQTCDFLKATCEHCGTENLVIEGPTTCGYL
      ::::::::::: ::::::::::: ::::::::::: ::::::::::: ::::::::::: :::::::::::
NSP2  RSVYPVASPNECNQMCLSTLMKCDHCGETSWQTDGDFVKATCEFCGTENLTKEGATTCGYL
          130         140         150         160         170         180

          190         200         210         220         230         240
NSP2  PTNAVVKMPCPACQDPEIGPEHSVADYHNHSNIETRLRKGGRTRCFGGCVFAYVGCYNKR
      : ::::::: ::::::: ::::::::::: ::::::::::: ::::::::::: :::::::::::
```

```

NSP2 PQNAVVKIYCPACHNSEVGPESHSLAEYHNESGLKTI LRKGGRTIAFGGCVFSYVGCHNKC
      190      200      210      220      230      240
      250      260      270      280      290      300
NSP2 AYWVPRASADIGSGHTGITGDNVETLNEDLLEILSRERVNINIVGDFHLNEEVAIILASF
      : : : : : : : : : : : : : : : : : : : : : : : : : : : : : : : : : : : :
NSP2 AYWVPRASANIGCNHTGVVGESEGLNDNLLEILQKEKVNINIVGDFKLNEEIILASF
      250      260      270      280      290      300
      310      320      330      340      350      360
NSP2 SASTSAFIDTIKSLDYKSFKTIVESCGNYKVTGKGPVKGAWNIGQQRSVLTPLCGFPSQA
      : : : : : : : : : : : : : : : : : : : : : : : : : : : : : : : : : :
NSP2 SASTSAFVETVKGLDYKAFKQIVESCENFKVTGKAKKGAWNIGEQKSILSPLYAFASEA
      310      320      330      340      350      360
      370      380      390      400      410      420
NSP2 AGVIRSIFARTLDAANHSIPDLQRAAVTILDGISEQSLRLVDAMVYTSDLLTNSVIIMAY
      : : : : : : : : : : : : : : : : : : : : : : : : : : : : : : : : : :
NSP2 ARVVRSIFSRTLETAQNSVRVLQKAAITILDGISQYSLRLIDAMMFTSDLATNNLVVMAY
      370      380      390      400      410      420
      430      440      450      460      470      480
NSP2 VTGGLVQQTQWLSNLLGTTVEKLRPIFEWIEAKLSAGVEFLKDAWEILKFLITGVFDIV
      . : : : : : : : : : : : : : : : : . : : : : : : : : : : : : : : : :
NSP2 ITGGVVQLTSQWL TNIFGTVYEKLPVLDWLEEKFKEGVEFLRDGWEIVKFISTCACEIV
      430      440      450      460      470      480
      490      500      510      520      530      540
NSP2 KGQIQVASDNIKDCVKCFIDVVNKALEMCIDQVTIAGAKLRSLNLGEVFIAQSKGLYRQC
      : : : . . . : : : : : : : : : : : : : : : : : : : : : : : : : : : :
NSP2 GGQIVTCAKEIKESVQTFKLVNKFLALCADSIIIGGAKLKALNLGETFVTHSKGLYRKC
      490      500      510      520      530      540
      550      560      570      580      590      600
NSP2 IRGKEQLQLL MPLKAPKEVTFLEGDSHDTVLTSEEVVLKNGELEALETPVDSFTNGAIVG
      . . . : : : : : : : : . . : : : : : : : : : : : : . . . : :
NSP2 VKSREETGLLMPLKAPKEIIFLEGETLPTEVLTSEEVVLKTGDLQPLEQPTSEAVEAPLVG
      550      560      570      580      590      600
      610      620      630
NSP2 TPVCVNGMLLLEIKDKEQYCALSPGLLATNNVFRKGG
      : : : : : : : : : : : : : : : : : : : : : : : : : : : : : : : : : :
NSP2 TPVCINGMLLLEIKDTEKYCALAPNMMVTNNTFTLKGG
      610      620      630

```

>--  
Waterman-Eggert score: 59; 20.6 bits; E(1) < 0.23  
25.0% identity (44.2% similar) in 52 aa overlap (144-193:130-177)

```

      150      160      170      180      190
NSP2 NHCDEVSQWTCDFLKATCEHCENLVIEG--PTTCGYLPTNAVVKMPCPAC
      : : : : : : : : : : : : : : : : : : : : : : : : : : : : : :
NSP2 NECN----QMCLSTLMKCDHCGETSWQTFVDFVQATCEFCGTENLTKEGATTC
      130      140      150      160      170

```

>--  
Waterman-Eggert score: 47; 17.5 bits; E(1) < 0.89

22.2% identity (50.0% similar) in 54 aa overlap (20-73:164-211)

```
      20      30      40      50      60      70
NSP2  CIKDFLARAGKSMCTLSEQLDYIESKRGVYCCRDHEHEIAWFTERSDKSYEHQT
      :  .  :..  :  .  :      :  ..  .::  :.  :..  :::  :....
NSP2  CGTENLTKEGATTCGYLPQNAVVK----IYCPACHNSEVG--PEHSLAEYHNES
      170      180      190      200      210
```

638 residues in 1 query sequences

638 residues in 1 library sequences

Scomplib [36.3.5e Nov, 2012(preload8)]

start: Fri May 8 08:16:56 2020 done: Fri May 8 08:16:56 2020

Total Scan time: 0.080 Total Display time: 0.040

Function used was LALIGN [36.3.5e Nov, 2012(preload8)]

[SIB Swiss Institute of Bioinformatics](#) | [Contact](#)

[Back to the Top](#)

# lalign output for NSP3 SARS COV vs. NSP3 SARS COV2

[EMBnet-Server] Date: Fri May 8 23:53:10 2020

```
# bin/lalign36 -E 10.0 -f -12 -g -2 5100.1.seq 5100.2.seq -J -K 3
LALIGN finds non-overlapping local alignments
version 36.3.5e Nov, 2012(preload8)
Please cite:
X. Huang and W. Miller (1991) Adv. Appl. Math. 12:373-381
```

```
Query: 5100.1.seq
1>>>NSP3 SARS CoV 1922 bp - 1922 aa
Library: 5100.2.seq
1945 residues in 1 sequences
```

```
Statistics: (shuffled [500]) MLE statistics: Lambda= 0.1707; K=0.01513
statistics sampled from 1 (1) to 500 sequences
Threshold: E() < 10 score: 51
Algorithm: Smith-Waterman (SSE2, Michael Farrar 2006) (7.2 Nov 2010)
Parameters: BL50 matrix (15:-5), open/ext: -12/-2
Scan time: 0.400
```

```
>>NSP3 SARS CoV-2 1945 bp (1945 aa)
Waterman-Eggert score: 10007; 2470.4 bits; E(1) < 0
76.0% identity (91.8% similar) in 1952 aa overlap (1-1922:1-1945)
```

```

      10      20      30      40      50      60
NSP3  APIKGVTFGEDTVWEVQGYKNVRITFELDERVDKVLNEKCSVYTVESGTEVTEFACVVAE
      : : : : : : : : : : : : : : : : : : : : : : : : : : : : : : : : : :
NSP3  APTK-VTFGDDTVIEVQGYKSVNITFELDERIDKVLNEKCSAYTVELGTEVNEFACVVAD
      10      20      30      40      50

      70      80      90     100     110     120
NSP3  AVVKTLQPVSDLLTNMGIDLDEWSVATFYLFDDAGEENFSSRMYSFYPPDEEEEDDAEC
      : : : : : : : : : : : : : : : : : : : : : : : : : : : : : : : : : :
NSP3  AVIKTLQPVSELLTPLGIDLDEWSMATYYLFDESGEFKLASHMYCSFYPPDEDEEEE-GDC
      60      70      80      90     100     110

      130     140     150     160     170
NSP3  EEEEEIDETCEHEYGTEDDYQGLPLEFGASAETVRVEEEEEEDWLDDTTEQS-----
      : : : : : : : : : : : : : : : : : : : : : : : : : : : : : : : : : :
NSP3  EEEEFEPSTQYEYGTEDDYQGKPLEFGATSAALQPEEEQEEDWLDDDSQQTIVGQQDGSSE
      120     130     140     150     160     170

      180     190     200     210
NSP3  -----EIEP--EPEPTP---EFPVNFQFTGYLKLTDNVAIKCVDIVKEAQSANPMV
      : : : : : : : : : : : : : : : : : : : : : : : : : : : : : : : : : :
NSP3  NQTTTIQITIVEVQPQLEMELTPVVQTIENVNSFSGYLKLTDNVYIKNADIVEEAKKVKPTV
      180     190     200     210     220     230

      220     230     240     250     260     270
NSP3  IVNAANIHLKHGGGVAGALNKATNGAMQKESDDYIKLNGPLTVGGSCLLSGHNLAKKCLH
      : : : : : : : : : : : : : : : : : : : : : : : : : : : : : : : : : :
NSP3  VVNAANVYLKHGGGVAGALNKATNNAMQVESDDYIATNGPLKVGGSVLSGHNLAKHCLH
```

```
      240      250      260      270      280      290
NSP3      280      290      300      310      320      330
NSP3 VVGPNLNAGEDIQLLKAAAYENFN SQDILLAPLLSAGIFGAKPLQSLQVCVQTVRTQVYIA
      : : : : : : : : : : : : : : : : : : : : : : : : : : : :
NSP3 VVGPNVNKGEDIQLLKSAYENFNQHEVLLAPLLSAGIFGADPIHSLRVCVDTVRTNVYLA
      300      310      320      330      340      350
      340      350      360      370      380      390
NSP3 VNDKALYEQVVM DYLDNLKPR-----VEAPKQEEPNTEDSKTEEKSVVQKPV DVKPKI
      : : : : : : : : . . : : : : : : : : : : : : : : : :
NSP3 VFDKNLYDKLVSSFFLEMKSEKQVEQKIAEIPKEEVKPFITESKP---SVEQRKQDDK-KI
      360      370      380      390      400      410
      400      410      420      430      440      450
NSP3 KACIDEVTTTTLEETKFLTNKLLLFADINGKLYHDSQNMLRGEDMSFLEK DAPYMVGDVIT
      : : : : : : : : : : : : : : : : : : : : : : : : : :
NSP3 KACVEEVTTTTLEETKFLTENLLLYIDINGNLHPDSATLVSDIDITFLK KDAPYIVGDVVQ
      420      430      440      450      460      470
      460      470      480      490      500      510
NSP3 SGDITCVVIPSKKAGGTTEMLSRALKKVPVDEYITTYPGQGCAGYTLEE AKTALKKCKSA
      : : : : : : : : : : : : : : : : : : : : : : : : :
NSP3 EGVLTAVVIPTKKAGGTTEMLAKALRKVPTDNYITTYPGQLNGYTV EEAKTVLKCKSA
      480      490      500      510      520      530
      520      530      540      550      560      570
NSP3 FYVLPSEAPNAKEEILGTVSWNLREMLAHAEE TRKLMVICMDVRAIMATIQRKYKGKIKIQ
      : : : : : : : : : : : : : : : : : : : : : : : : :
NSP3 FYILPSIISNEKQEILGTVSWNLREMLAHAEE TRKLMVPCVETKAIVSTIQRKYKGKIKIQ
      540      550      560      570      580      590
      580      590      600      610      620      630
NSP3 EGIVDYGVRFFFFYTSKEPVASIITKLN SLNEPLVTMPIGYVTHGFNLEEAARC MRSLKAP
      : : : : : : : : : : : : : : : : : : : : : : : : :
NSP3 EGVVDYGARFYFYTSKTTVASLINTLN DNLNETLVTMPLGYVTHGLNLEEAARY MRSLKVP
      600      610      620      630      640      650
      640      650      660      670      680      690
NSP3 AVVSVSPDAVTTYNGYLTSSSKTSEEHFVETV SLAGSYRDWSYSGQRTELGVEFLKRGD
      : : : : : : : : : : : : : : : : : : : : : : : : :
NSP3 ATVSVSPDAVTA YNGYLTSSSKTPEEHFIETISLAGSYKDWSYSG QSTQLGIEFLKRGD
      660      670      680      690      700      710
      700      710      720      730      740      750
NSP3 KIVYHTLES PVEFHL DGEVLSL DKLSLLS LREVVTIKVFTTV DNTNLHTQLVDMSMTYG
      : : : : : : : : : : : : : : : : : : : : : : : : :
NSP3 KSVYYT-SNPTTFHLDGEVITFDNLK TLLSLREVVTIKVFTTV DNINLHTQVVDMSMTYG
      720      730      740      750      760      770
      760      770      780      790      800      810
NSP3 QQFGPTYLDGADVTKIKPHVNHEGK TFFVLP SDDTLRSEAFEY YHTLDESFLGRYMSALN
      : : : : : : : : : : : : : : : : : : : : : : : : :
NSP3 QQFGPTYLDGADVTKIKPHNSHEGKT FVYVLPND DTLRVEAFEY YHTT DPSFLGRYMSALN
      780      790      800      810      820      830
      820      830      840      850      860      870
```



```

NSP3 HTKKWKFPQVGGGLTSIKWADNNCYLSSVLLALQQLEVKFNAPALQEAYYRARAGDAANFC
      .....
NSP3 HTKKWKYPQVNGGLTSIKWADNNCYLATALLTQQIELKFNPPALQDAYYRARAGEAANFC
      840      850      860      870      880      890

      880      890      900      910      920      930
NSP3 ALILAYSNKTVGELGDVRETMTHLLQHANLES AKRVLNVVCKHCGQKTTTLTGVEAVMYM
      .....
NSP3 ALILAYCNKTVGELGDVRETM SYL FQHANLD SCKRVLNVVCKTCGQQQTTLKGVEAVMYM
      900      910      920      930      940      950

      940      950      960      970      980      990
NSP3 GTLSYDNLKTGVSIPCVCGRDATQYLVQQESSFVMMSAPPAEYKLOQGTFLCANEYTGNY
      .....
NSP3 GTLSYEQFKKGVIPTCGKQATKYL VQQESP FVMMSAPPAQYELKHGTFTCASEYTGNY
      960      970      980      990      1000      1010

      1000      1010      1020      1030      1040      1050
NSP3 QCGHYTHITAKETLYRIDGAHLTKMSEYKGPVTDV FYKETS YTTTTIKPVSYKLDGVTYTE
      .....
NSP3 QCGHYKHITSKETLYCIDGALLTKSSEYKGPITDV FYKENS YTTTTIKPVTYKLDGVVCTE
      1020      1030      1040      1050      1060      1070

      1060      1070      1080      1090      1100      1110
NSP3 IEPKLDGYYKKDNAYYTEQPIDLVPTQPLPNASFDNFKLTCSNTKFADDLNQMTGFTKPA
      .....
NSP3 IDPKLDNYYKKDNSYFTEQPIDLVPNQYPNASFDNFK FVCDNIK FADDLNQLTG YKKPA
      1080      1090      1100      1110      1120      1130

      1120      1130      1140      1150      1160      1170
NSP3 SRELSVTFPPDLNGDVVAIDYRHYSASF KKGAKLLHKPIVWHINQATTKTTFKPNTWCLR
      .....
NSP3 SRELKVTFFPDLNGDVVAIDYKH YTPSF KKGAKLLHKPIVWHVNNATNKATYKPNTWCIR
      1140      1150      1160      1170      1180      1190

      1180      1190      1200      1210      1220      1230
NSP3 CLWSTKPVDTSSNSFEVLAVEDTQGM DN LACESQQPTSEEVVENPTIQKEVIECDVKTTEV
      .....
NSP3 CLWSTKPVETSNSFDVLKSEDAQGM DN LACEDLKP VSEEVVENPTIQKDVLECNVKTTEV
      1200      1210      1220      1230      1240      1250

      1240      1250      1260      1270      1280      1290
NSP3 VGNVILKPSDEGVKVTQELGHEDLMAAYVENTSITIKPNELSLALGLKTIATHGIAAIN
      .....
NSP3 VGDII LKPANN SLKITEEVGHTDLMAAYVDNSSLTIKPNELSRVLGLKTLATHGLAAVN
      1260      1270      1280      1290      1300      1310

      1300      1310      1320      1330      1340      1350
NSP3 SVPWSKILAYVKPFLGQAAITTSNCAKRLAQRVFNNYMPYVFTLLFQLCTFTKSTNSRIR
      .....
NSP3 SVPWDTIAN YAKPFLNKVVSTTTNIVTRCLNRVCTNYMPYFF TLLQLCTFTRSTNSRIK
      1320      1330      1340      1350      1360      1370

      1360      1370      1380      1390      1400      1410
NSP3 ASLPTTI AKNSVKSVAKLCLDAGINYVKS PKFSKLF TIAMWLLLLSICLGS LICV TAAFG
      .....
NSP3 ASMPTTI AKNTVKS V GKFCLEASFNYL KSPNFSK LINIIWFLLLSVCLGSLIYSTAALG

```



Waterman-Eggert score: 90; 28.2 bits; E(1) < 0.012  
22.2% identity (45.8% similar) in 216 aa overlap (866-1071:852-1062)

```
      870      880      890      900      910      920
NSP3  AANFCALILAYSNKTVGELGDVRETMTLLQHANLES AKRVLNVVCKHCGQKTTTTLTGVE
      : : : : : . : : . . : : : : : . . . . : :
NSP3  ADNNCYLATALLTQQIELKFNPPALQDAYYRARAGEAANFCALILAYCNKTVGELGDV
      860      870      880      890      900      910

      930      940      950      960      970      980
NSP3  AVM-YM-GTLSYDNLKTGVSIPC-VCGRDATQYLVQQESSFVMSAPPAEYKLQ-QGTFL
      . : . . : : . . . : : : : : : : . . . : :
NSP3  ETMSYLFQHANLDSCKRVLNVVCKTCGQQOTT-LKGVEAVMYMGTLSEYQFKKGVQIPCT
      920      930      940      950      960      970

      990      1000      1010      1020      1030
NSP3  CANEYTGNY--QCGHYTHITAKETLYRIDGAHLTKMSEYKGPVTDVFKETS YTTTIKPV
      : . . : : . . . : : . . . : : : : : : : . . . :
NSP3  CGKQATKYL VQQESP FVMSAPPAQYELKHGTF TCASEYTGNYQCGHYKHITSKETL---
      980      990      1000      1010      1020

      1040      1050      1060      1070
NSP3  SYKLDGVTYTEIE----PKLDGYKKDNAYYTEQPI
      : . . . : : : : : : : : : : : :
NSP3  -YCIDGALLTKSSEYKGPITDVFYKENS YTTTIKPV
      1030      1040      1050      1060
```

>--

Waterman-Eggert score: 88; 27.7 bits; E(1) < 0.017  
23.2% identity (53.0% similar) in 181 aa overlap (870-1039:926-1094)

```
      870      880      890      900      910      920
NSP3  CALILAYSNKTVGELGDVRETMTLLQHANL--ESAKRVLNVVCKHCGQKTTT-LTGVEA
      : : : : : : : . . . . . : : : : : : : : : : : :
NSP3  CKRVLNVVCKTCGQQOTT LKGVEAVMYMGTLSEYQFKKGVQIPCT-CGKQATKYL VQQES
      930      940      950      960      970      980

      930      940      950      960      970      980
NSP3  --VMYMGTLSDNLKTGVSIPCVCGRDATQYLVQ-QESSFVMSAPPAEYKLQQTFLCA
      : : . . . : : : : : : : : : : : . . . . .
NSP3  PFVMSAPPAQYELKHG-TFTC-----ASEYTGNYQCGHYKHITSKETLYCIDGALLTKS
      990      1000      1010      1020      1030

      990      1000      1010      1020      1030
NSP3  NEYTGNI-----YQCGHYTHITAKETLYRIDGAHLTKMSEYKGPVTDVFKETS YTTTIKPV
      : : : : : : : : : : : : : : : : : : : : : :
NSP3  SEYKGPITDVFYKENS YTTTIKPVTYKLDG VVCTEID----PKLDNYYKKDN SYFTEQP
      1040      1050      1060      1070      1080      1090
```

```
NSP3  V
      .
NSP3  I
```

1922 residues in 1 query sequences  
1945 residues in 1 library sequences  
Scomplib [36.3.5e Nov, 2012(preload8)]  
start: Fri May 8 23:53:10 2020 done: Fri May 8 23:53:11 2020  
Total Scan time: 0.400 Total Display time: 0.170

Function used was LALIGN [36.3.5e Nov, 2012(preload8)]

# lalign output for NSP4 SARS COV vs. NSP4 SARS COV2

[EMBnet-Server] Date: Fri May 8 23:55:53 2020

```
# bin/lalign36 -E 10.0 -f -12 -g -2 5147.1.seq 5147.2.seq -J -K 3
LALIGN finds non-overlapping local alignments
  version 36.3.5e Nov, 2012(preload8)
Please cite:
  X. Huang and W. Miller (1991) Adv. Appl. Math. 12:373-381
```

```
Query: 5147.1.seq
      1>>>NSP4 SARS CoV 500 bp - 500 aa
Library: 5147.2.seq
        500 residues in      1 sequences
```

```
Statistics: (shuffled [500]) MLE statistics: Lambda= 0.1594; K=0.01801
  statistics sampled from 1 (1) to 500 sequences
Threshold: E() < 10 score: 38
Algorithm: Smith-Waterman (SSE2, Michael Farrar 2006) (7.2 Nov 2010)
Parameters: BL50 matrix (15:-5), open/ext: -12/-2
Scan time: 0.050
```

```
>>NSP4 SARS CoV-2 500 bp (500 aa)
  Waterman-Eggert score: 2853; 661.7 bits; E(1) < 1.6e-194
80.0% identity (95.0% similar) in 500 aa overlap (1-500:1-500)
```

```
      10      20      30      40      50      60
NSP4  KIVSTCFKMLKATLLCVLAALVCYIVMPVHTLSIHDGYTNEIIGYKAIQDGVTRDIIST
      ..... : ..... : ... : ..... : ..... : ..... :
NSP4  KIVNNWLKQLIKVTLVFLFVAIIFYLITPVHVMKHTDFSSEIIGYKAIDGGVTRDIAS
      10      20      30      40      50      60

      70      80      90     100     110     120
NSP4  DDCFANKHAGFDWFSQRGGSYKNDKSCPVVAIITREIGFIVPGLPGTVLRAINGDFLH
      : ..... : ..... : ..... : ..... : ..... : ..... :
NSP4  DTCFANKHADFDTWFSQRGGSYTNKACPLIAAVITREVGFFVVPGLPGTILRTTNGDFLH
      70      80      90     100     110     120

      130     140     150     160     170     180
NSP4  FLPRVFSAVGNICYTPSKLIEYSDFATSACVLAAECTIFKDAMGKVPYCYDTNLLEGS
      : ..... : ..... : ..... : ..... : ..... : ..... :
NSP4  FLPRVFSAVGNICYTPSKLIEYTDFAATSACVLAAECTIFKDGKVPYCYDTNVLEGSV
      130     140     150     160     170     180

      190     200     210     220     230     240
NSP4  SYSELRPDTRYVLMDSIIQFPNTYLEGSRVVTTFDAEYCRHGTCERSEVVICLSTSGR
      . : ..... : ..... : ..... : ..... : ..... : ..... :
NSP4  AYESLRPDTRYVLMDSIIQFPNTYLEGSRVVTTFDSEYCRHGTCERSEAGVCVSTSGR
      190     200     210     220     230     240

      250     260     270     280     290     300
NSP4  WVLNNEHYRALSGVFCGVDAMNLIANIFTPLVQVPGALDVSASVAGGIIAILVTCAAY
      : ..... : ..... : ..... : ..... : ..... : ..... :
NSP4  WVLNNDYRSLPGVFCGVDVAVNLLTNMFTPLIQPIGALDISASIVAGGIVAVVTCLAY
```

```

                250      260      270      280      290      300
                310      320      330      340      350      360
NSP4  FMKFRRVFGGEYNHVVAANALLFLMSFTILCLVPAYSFLPGVYSVFYLYLTFYFTNDVSFL
      ..... : : : : : : : : : : : : : : : : : : : : : : : : : : : : : :
NSP4  FMRFRRAFGEYSHVVAFNTLLFLMSFTVLCLTPVYSFLPGVYSVIYLYLTFYLTNDVSFL
                310      320      330      340      350      360

                370      380      390      400      410      420
NSP4  AHLQWFAMFSPIVPFWITAIYVFCISLKHCHWFFNNYLRKRVMFNGVTFSTFEEAALCTF
      ..... : : : : : : : : : : : : : : : : : : : : : : : :
NSP4  AHIQWMVMFTPLVPFWITIAIYIICISTKHFYWFFSNYLKRRVVFNGVVSFSTFEEAALCTF
                370      380      390      400      410      420

                430      440      450      460      470      480
NSP4  LLNKEMYLKLRSETLLPLTQYNRYLALYNKYKYFSGALDTTSYREAACCHLAKALNDFSN
      ..... : : : : : : : : : : : : : : : : : : : : : : : :
NSP4  LLNKEMYLKLRSDVLLPLTQYNRYLALYNKYKYFSGAMDTTSYREAACCHLAKALNDFSN
                430      440      450      460      470      480

                490      500
NSP4  SGADVLYQPPQTSITSAVLQ
      ..... : : : : : : : : : : : : : : : : : : : : : : : :
NSP4  SGSDVLYQPPQTSITSAVLQ
                490      500

```

```

>--
Waterman-Eggert score: 48; 16.8 bits; E(1) < 0.88
35.0% identity (70.0% similar) in 20 aa overlap (113-132:242-261)

```

```

                120      130
NSP4  AINGDFLHFLPRVFSAVGNI
      ..... : : : : : : : : .
NSP4  VLNNDYRSLPGVFCGVDAV
                250      260

```

```

>--
Waterman-Eggert score: 43; 15.7 bits; E(1) < 0.99
20.0% identity (66.7% similar) in 30 aa overlap (440-469:389-418)

```

```

                440      450      460
NSP4  QYNRYLALYNKYKYFSGALDTTSYREAACC
      .. ... : : . .... : : : : :
NSP4  HFYWFFSNYLKRRVVFNGVVSFSTFEEAALC
                390      400      410

```

```

500 residues in 1 query sequences
500 residues in 1 library sequences
Scomplib [36.3.5e Nov, 2012(preload8)]
start: Fri May 8 23:55:54 2020 done: Fri May 8 23:55:54 2020
Total Scan time: 0.050 Total Display time: 0.030

```

Function used was LALIGN [36.3.5e Nov, 2012(preload8)]

# lalign output for NSP5 SARS COV vs. NSP5 SARS COV2

[EMBnet-Server] Date: Fri May 8 23:57:29 2020

```
# bin/lalign36 -E 10.0 -f -12 -g -2 5109.1.seq 5109.2.seq -J -K 3
LALIGN finds non-overlapping local alignments
  version 36.3.5e Nov, 2012(preload8)
Please cite:
  X. Huang and W. Miller (1991) Adv. Appl. Math. 12:373-381
```

```
Query: 5109.1.seq
      1>>>NSP5 SARS CoV 306 bp - 306 aa
Library: 5109.2.seq
        306 residues in      1 sequences
```

```
Statistics: (shuffled [500]) MLE statistics: Lambda= 0.1754; K= 0.027
  statistics sampled from 1 (1) to 500 sequences
Threshold: E() < 10 score: 32
Algorithm: Smith-Waterman (SSE2, Michael Farrar 2006) (7.2 Nov 2010)
Parameters: BL50 matrix (15:-5), open/ext: -12/-2
Scan time: 0.020
```

```
>>NSP5 SARS CoV-2 306 bp (306 aa)
  Waterman-Eggert score: 2043; 522.2 bits; E(1) < 6e-153
  96.1% identity (99.7% similar) in 306 aa overlap (1-306:1-306)
```

```
      10      20      30      40      50      60
NSP5  SGFRKMAFPSPGKVEGCMVQVTCGTTTLNGLWLDDTVYCPRHVICTAEDMLNPNYEDLLIR
      :
NSP5  SGFRKMAFPSPGKVEGCMVQVTCGTTTLNGLWLDDVVYCPRHVICTSEDMLNPNYEDLLIR
      10      20      30      40      50      60

      70      80      90     100     110     120
NSP5  KSNHSFLVQAGNVQLRVIGHSMQNCLLRLKVDTSNPKTPKYKFVRIQPGQTFSVLACYNG
      :
NSP5  KSNHNFLVQAGNVQLRVIGHSMQNCVLKLVDTANPKTPKYKFVRIQPGQTFSVLACYNG
      70      80      90     100     110     120

      130     140     150     160     170     180
NSP5  SPSGVYQCAMRPNHTIKGSFLNGSCGSVGFNIDYDCVSFCYMHHMELPTGVHAGTDLEGIK
      :
NSP5  SPSGVYQCAMRPNFTIKGSFLNGSCGSVGFNIDYDCVSFCYMHHMELPTGVHAGTDLEGN
      130     140     150     160     170     180

      190     200     210     220     230     240
NSP5  FYGPFVDRQTAQAAGTDTTITLNLVLAWLYAAVINGDRWFLNRFTTTLNDFNLVAMKYNYE
      :
NSP5  FYGPFVDRQTAQAAGTDTTITVNLVLAWLYAAVINGDRWFLNRFTTTLNDFNLVAMKYNYE
      190     200     210     220     230     240

      250     260     270     280     290     300
NSP5  PLTQDHDVDILGPLSAQTGIAVLDMCAALKELLQNGMNGRTILGSTILEDEFTPFVVRQC
      :
NSP5  PLTQDHDVDILGPLSAQTGIAVLDMCASLKELLQNGMNGRTILGSALLEDEFTPFVVRQC
```

250 260 270 280 290 300

NSP5 SGVTFQ  
: : : : :  
NSP5 SGVTFQ

>--

Waterman-Eggert score: 61; 20.6 bits; E(1) < 0.055  
28.6% identity (61.9% similar) in 42 aa overlap (123-163:1-41)

130 140 150 160  
NSP5 SGVYQCAMPNHTIKGSFLNGSCGSVGFN-IDYDCVSFCYMH  
: : . : . : . : . : . : . : . : . : : : : : :  
NSP5 SGFRKMAF-PSGKVEGCMVQVTCGTTTTLNLGLWLDVVCPRH  
10 20 30 40

>--

Waterman-Eggert score: 54; 18.9 bits; E(1) < 0.18  
26.2% identity (61.9% similar) in 42 aa overlap (1-41:123-163)

10 20 30 40  
NSP5 SGFRKMAF-PSGKVEGCMVQVTCGTTTTLNLGLWLDVVCPRH  
: : . : . : . : . : . : . : . : . : : : : : :  
NSP5 SGVYQCAMPNFTIKGSFLNGSCGSVGFN-IDYDCVSFCYMH  
130 140 150 160

306 residues in 1 query sequences  
306 residues in 1 library sequences  
Scomplib [36.3.5e Nov, 2012(preload8)]  
start: Fri May 8 23:57:30 2020 done: Fri May 8 23:57:30 2020  
Total Scan time: 0.020 Total Display time: 0.010

Function used was LALIGN [36.3.5e Nov, 2012(preload8)]



# lalign output for NSP6 SARS COV vs. NSP6 SARS COV2

[EMBnet-Server] Date: Sat May 9 0:01:32 2020

```
# bin/lalign36 -E 10.0 -f -12 -g -2 6675.1.seq 6675.2.seq -J -K 3
LALIGN finds non-overlapping local alignments
  version 36.3.5e Nov, 2012(preload8)
Please cite:
  X. Huang and W. Miller (1991) Adv. Appl. Math. 12:373-381
```

```
Query: 6675.1.seq
      1>>>NSP6 SARS CoV 290 bp - 290 aa
Library: 6675.2.seq
        290 residues in      1 sequences
```

```
Statistics: (shuffled [500]) MLE statistics: Lambda= 0.1386; K=0.0262
  statistics sampled from 1 (1) to 500 sequences
Threshold: E() < 10 score: 39
Algorithm: Smith-Waterman (SSE2, Michael Farrar 2006) (7.2 Nov 2010)
Parameters: BL50 matrix (15:-5), open/ext: -12/-2
Scan time: 0.020
```

```
>>NSP6 SARS CoV-2 290 bp (290 aa)
  Waterman-Eggert score: 1750; 355.2 bits; E(1) < 1e-102
88.2% identity (98.3% similar) in 287 aa overlap (4-290:4-290)
```

```
      10      20      30      40      50      60
NSP6  KKIVKGTHTHWMLLTFLTSLLLILVQSTQWSLFFFVYENAFPLPFTLGIMAIAACAMLLVKHK
      . . . . .
NSP6  KRTIKGTHTHWMLLTILTSLLLVLVQSTQWSLFFFLYENAFPLPFAMGIIAMSAFAMMFVKHK
      10      20      30      40      50      60

      70      80      90     100     110     120
NSP6  HAFCLCLFLLPSLATVAYFNMVYPASWVMRIMTWLELADTSLSGYRLKDCVMYASALVLL
      . . . . .
NSP6  HAFCLCLFLLPSLATVAYFNMVYPASWVMRIMTWLDMVDTSLSGFKLKDCVMYASAVLL
      70      80      90     100     110     120

      130     140     150     160     170     180
NSP6  ILMTARTVYDDAARRVWTLNMNVITLVYKVVYGNALDQAISMWALVISVTSNYSGVVTTIM
      . . . . .
NSP6  ILMTARTVYDDGARRVWTLNMNVLTLVYKVVYGNALDQAISMWALIIISVTSNYSGVVTTVM
      130     140     150     160     170     180

      190     200     210     220     230     240
NSP6  FLARAIIVFCVEEYPLLFIITGNTLQCIMLVYCFGLGYCCCCYFGLFCLLNRYFRLTLGVYD
      . . . . .
NSP6  FLARGIVFMCVEYCPFIFFITGNTLQCIMLVYCFGLGYFCTCYFGLFCLLNRYFRLTLGVYD
      190     200     210     220     230     240

      250     260     270     280     290
NSP6  YLVSTQEFRYMNSQGLLPPKSSIDAFKLNKLLGIGGKPCIKVATVQ
      . . . . .
NSP6  YLVSTQEFRYMNSQGLLPPKNSIDAFKLNKLLGVGGKPCIKVATVQ
```

250 260 270 280 290

>--

Waterman-Eggert score: 54; 16.1 bits; E(1) < 0.71  
15.2% identity (56.5% similar) in 46 aa overlap (199-242:183-228)

```

      200      210      220      230      240
NSP6  LLFITGNTLQICIML--VYCFLGYCCCCYFGLFCLLNRYFRLTLGVY
      ... : ..... : : : : ..... : .....
NSP6  MFLARGIVFMCVEYCPPIFFITGNTLQICIMLVYCFLGYFCTCYFGLF
      190      200      210      220

```

>--

Waterman-Eggert score: 49; 15.1 bits; E(1) < 0.92  
17.5% identity (50.2% similar) in 211 aa overlap (17-217:41-245)

```

      20      30      40      50      60      70
NSP6  TFLTSLILVQSTQWSLFFFVYENAFLPFTL--GIMAIACAMLLVKHKHAFCLCLFLLPS
      ... : ..... : ..... : : : : ..... : .....
NSP6  AFLPFAMGIIAMSAFAMMFVKHKHAFCLCLFLLPSLATVAYFNMVYPASWVMRIMTWLDM
      50      60      70      80      90      100

```

```

      80      90      100      110      120
NSP6  LAT-VAYFNM----VYPASWVMRIMTWLELADTSLSGYRLKDCVMYASALVLLILMTAR
      . : .. :.. : : : : : : : : : : : : : : : :
NSP6  VDTSLSGFKLKDCVMYASAVLLILMTARTVYD---DGARRVWTLMNVLTLVYKVVYGNNA
      110      120      130      140      150

```

```

      130      140      150      160      170      180
NSP6  TVYDDAARRVWTLMNVITLVYKVVYGNALDQAISMWALVISVTSNY---SGVVTTIMFLA
      : : : : : : : : : : : : : : : : : : : :
NSP6  L---DQAISMWALIIISVTSNYSGVVTTVMFLARGIVFMCVEYCPPIFFITGNTLQICIMLVY
      160      170      180      190      200      210

```

```

      190      200      210
NSP6  RAIVFVCVEYYPLLFIITGNTLQICIMLVYCFL
      . . :. :. :. :. :. :. :. :. :.
NSP6  CFLGYFCTCYFGLFCLLNRYFRLTLGVYDYL
      220      230      240

```

290 residues in 1 query sequences  
 290 residues in 1 library sequences  
 Scmplib [36.3.5e Nov, 2012(preload8)]  
 start: Sat May 9 00:01:33 2020 done: Sat May 9 00:01:33 2020  
 Total Scan time: 0.020 Total Display time: 0.020

Function used was LALIGN [36.3.5e Nov, 2012(preload8)]

# lalign output for NSP7 SARS COV vs. NSP7 SARS COV2

[EMBnet-Server] Date: Sat May 9 0:03:08 2020

---

```
# bin/lalign36 -E 10.0 -f -12 -g -2 5099.1.seq 5099.2.seq -J -K 3
LALIGN finds non-overlapping local alignments
  version 36.3.5e Nov, 2012(preload8)
Please cite:
  X. Huang and W. Miller (1991) Adv. Appl. Math. 12:373-381
```

```
Query: 5099.1.seq
      1>>>NSP7 SARS CoV 83 bp - 83 aa
Library: 5099.2.seq
        83 residues in      1 sequences
```

```
Statistics: (shuffled [500]) MLE statistics: Lambda= 0.1692; K=0.0695
  statistics sampled from 1 (1) to 500 sequences
Threshold: E() < 10 score: 23
Algorithm: Smith-Waterman (SSE2, Michael Farrar 2006) (7.2 Nov 2010)
Parameters: BL50 matrix (15:-5), open/ext: -12/-2
Scan time: 0.000
```

```
>>NSP7 SARS CoV-2 83 bp (83 aa)
  Waterman-Eggert score: 513; 129.1 bits; E(1) < 9.6e-36
98.8% identity (100.0% similar) in 83 aa overlap (1-83:1-83)
```

```
          10      20      30      40      50      60
NSP7  SKMSDVKCTSVVLLSVLQQLRVESSKSLWAQCVQLHNDILLAKDTTEAFEKMSVLLSVLL
      : : : : : : : : : : : : : : : : : : : : : : : : : : : : : : : : : :
NSP7  SKMSDVKCTSVVLLSVLQQLRVESSKSLWAQCVQLHNDILLAKDTTEAFEKMSVLLSVLL
          10      20      30      40      50      60

          70      80
NSP7  SMQGAVDINRLCEEMLDNRATLQ
      : : : : : : : : : : : : : : : : : : : : : : : : : : : : : :
NSP7  SMQGAVDINKLCEEMLDNRATLQ
          70      80
```

```
>--
  Waterman-Eggert score: 30; 11.2 bits; E(1) < 0.95
54.5% identity (81.8% similar) in 11 aa overlap (53-63:11-21)
```

```
          60
NSP7  VLLSVLLSMQ
      : : : : : ...
NSP7  VVLLSVLQQLR
          20
```

```
>--
  Waterman-Eggert score: 30; 11.2 bits; E(1) < 0.95
54.5% identity (81.8% similar) in 11 aa overlap (11-21:53-63)
```

```
          20
NSP7  VVLLSVLQQLR
```

NSP7 : : : : : ...  
VLLSVLLSMQ  
60

83 residues in 1 query sequences  
83 residues in 1 library sequences  
Scomplib [36.3.5e Nov, 2012(preload8)]  
start: Sat May 9 00:03:08 2020 done: Sat May 9 00:03:08 2020  
Total Scan time: 0.000 Total Display time: 0.000

Function used was LALIGN [36.3.5e Nov, 2012(preload8)]

# lalign output for NSP8 SARS COV vs. NSP8 SARS COV2

[EMBnet-Server] Date: Sat May 9 0:04:50 2020

```
# bin/lalign36 -E 10.0 -f -12 -g -2 5098.1.seq 5098.2.seq -J -K 3
LALIGN finds non-overlapping local alignments
  version 36.3.5e Nov, 2012(preload8)
Please cite:
  X. Huang and W. Miller (1991) Adv. Appl. Math. 12:373-381
```

```
Query: 5098.1.seq
      1>>>NSP8 SARS CoV 198 bp - 198 aa
Library: 5098.2.seq
        198 residues in      1 sequences
```

```
Statistics: (shuffled [500]) MLE statistics: Lambda= 0.1533; K=0.02416
  statistics sampled from 1 (1) to 500 sequences
Threshold: E() < 10 score: 30
Algorithm: Smith-Waterman (SSE2, Michael Farrar 2006) (7.2 Nov 2010)
Parameters: BL50 matrix (15:-5), open/ext: -12/-2
Scan time: 0.010
```

```
>>NSP8 SARS CoV-2 198 bp (198 aa)
  Waterman-Eggert score: 1220; 275.1 bits; E(1) < 6e-79
  97.5% identity (100.0% similar) in 198 aa overlap (1-198:1-198)
```

```
      10      20      30      40      50      60
NSP8  AIASEFSSLPSYAAAYATAQEAYEQAVANGDSEVVLKKLKSLNVAKSEFDRDAAMQRKLE
      :
NSP8  AIASEFSSLPSYAAFATAQEAYEQAVANGDSEVVLKKLKSLNVAKSEFDRDAAMQRKLE
      10      20      30      40      50      60

      70      80      90     100     110     120
NSP8  KMADQAMTQMYQARSEDKRAKVTSAMQTMFTMLRKLNDALNNIINNARDGCVPLNII
      :
NSP8  KMADQAMTQMYQARSEDKRAKVTSAMQTMFTMLRKLNDALNNIINNARDGCVPLNII
      70      80      90     100     110     120

      130     140     150     160     170     180
NSP8  PLTTAAKLMVVVPDYGTYNKTCDGNTFTYASALWEIQQVVDADSKIVQLSEINMDNSPNL
      :
NSP8  PLTTAAKLMVVIPDYNTYKNTCDGTTFTYASALWEIQQVVDADSKIVQLSEISMDNSPNL
      130     140     150     160     170     180

      190
NSP8  AWPLIVTALRANSAVKLQ
      :
NSP8  AWPLIVTALRANSAVKLQ
      190
```

```
>--
  Waterman-Eggert score: 55; 17.5 bits; E(1) < 0.19
  23.9% identity (65.2% similar) in 46 aa overlap (57-102:36-81)
```

```

      60          70          80          90         100
NSP8  RKLEKMDAQAMTQMYKQARSEDKRAKVTSAMQTMLFTMLRKLNDNA
      .:.:.: . : ... ..: . : :... :.:. . :. :. :
NSP8  KKLKKSLLNVAKSEFDRDAAMQRKLEKMDAQAMTQMYKQARSEDKRA
      40          50          60          70          80

```

>--

Waterman-Eggert score: 55; 17.5 bits; E(1) < 0.19  
 23.9% identity (65.2% similar) in 46 aa overlap (36-81:57-102)

```

      40          50          60          70          80
NSP8  KKLKKSLLNVAKSEFDRDAAMQRKLEKMDAQAMTQMYKQARSEDKRA
      .:.:.: . : ... ..: . : :... :.:. . :. :. :
NSP8  RKLEKMDAQAMTQMYKQARSEDKRAKVTSAMQTMLFTMLRKLNDNA
      60          70          80          90         100

```

198 residues in 1 query sequences  
 198 residues in 1 library sequences  
 Scomplib [36.3.5e Nov, 2012(preload8)]  
 start: Sat May 9 00:04:50 2020 done: Sat May 9 00:04:50 2020  
 Total Scan time: 0.010 Total Display time: 0.010

Function used was LALIGN [36.3.5e Nov, 2012(preload8)]

# lalign output for NSP9 SARS COV vs. NSP9 SARS COV2

[EMBnet-Server] Date: Sat May 9 0:07:40 2020

---

```
# bin/lalign36 -E 10.0 -f -12 -g -2 6675.1.seq 6675.2.seq -J -K 3
LALIGN finds non-overlapping local alignments
  version 36.3.5e Nov, 2012(preload8)
Please cite:
  X. Huang and W. Miller (1991) Adv. Appl. Math. 12:373-381
```

```
Query: 6675.1.seq
      1>>>NSP9 SARS CoV 113 bp - 113 aa
Library: 6675.2.seq
        113 residues in      1 sequences
```

```
Statistics: (shuffled [500]) MLE statistics: Lambda= 0.2089; K=0.06941
  statistics sampled from 1 (1) to 500 sequences
Threshold: E() < 10 score: 21
Algorithm: Smith-Waterman (SSE2, Michael Farrar 2006) (7.2 Nov 2010)
Parameters: BL50 matrix (15:-5), open/ext: -12/-2
Scan time: 0.000
```

```
>>NSP9 SARS CoV-2 113 bp (113 aa)
  Waterman-Eggert score: 733; 224.8 bits; E(1) < 2.8e-64
97.3% identity (99.1% similar) in 113 aa overlap (1-113:1-113)
```

```
          10          20          30          40          50          60
NSP9  NNELSPVALRQMSCAAGTTQTACTDDNALAYYNNNSKGGRFVLALLSDHQDLKWARFPKSD
      : : : : : : : : : : : : : : : : : : : : : : : : : : : : : : : : : :
NSP9  NNELSPVALRQMSCAAGTTQTACTDDNALAYYNTTKGGRFVLALLSDLQDLKWARFPKSD
          10          20          30          40          50          60

          70          80          90          100         110
NSP9  GTGTIYTELEPPCRFVTDTPKGPKVKYLYFIKGLNNLNRMVGLGSLAATVRLQ
      : : : : : : : : : : : : : : : : : : : : : : : : : : : : : : : : :
NSP9  GTGTIYTELEPPCRFVTDTPKGPKVKYLYFIKGLNNLNRMVGLGSLAATVRLQ
          70          80          90          100         110
```

```
>--
  Waterman-Eggert score: 26; 11.7 bits; E(1) < 0.98
26.1% identity (43.5% similar) in 23 aa overlap (16-38:15-37)
```

```
          20          30
NSP9  AGTTQTACTDDNALAYYNNNSKGG
      : : . : . : : : :
NSP9  AAGTTQTACTDDNALAYYNTTKG
          20          30
```

```
>--
  Waterman-Eggert score: 25; 11.4 bits; E(1) < 0.99
27.8% identity (50.0% similar) in 18 aa overlap (59-76:24-41)
```

```
          60          70
NSP9  SDGTGTIYTELEPPCRFV
```

```
NSP9      .. .. : .   :::  
          TDDNALAYYNTTKGGRFV  
          30      40
```

113 residues in 1 query sequences

113 residues in 1 library sequences

Scomplib [36.3.5e Nov, 2012(preload8)]

start: Sat May 9 00:07:40 2020 done: Sat May 9 00:07:40 2020

Total Scan time: 0.000 Total Display time: 0.010

Function used was LALIGN [36.3.5e Nov, 2012(preload8)]



# lalign output for NSP10 SARS COV vs. NSP10 SARS COV2

[EMBnet-Server] Date: Sat May 9 0:09:58 2020

---

```
# bin/lalign36 -E 10.0 -f -12 -g -2 5099.1.seq 5099.2.seq -J -K 3
LALIGN finds non-overlapping local alignments
  version 36.3.5e Nov, 2012(preload8)
Please cite:
  X. Huang and W. Miller (1991) Adv. Appl. Math. 12:373-381
```

```
Query: 5099.1.seq
  1>>>NSP10 SARS CoV 139 bp - 139 aa
Library: 5099.2.seq
  139 residues in      1 sequences
```

```
Statistics: (shuffled [500]) MLE statistics: Lambda= 0.1369; K=0.02402
  statistics sampled from 1 (1) to 500 sequences
Threshold: E() < 10 score: 28
Algorithm: Smith-Waterman (SSE2, Michael Farrar 2006) (7.2 Nov 2010)
Parameters: BL50 matrix (15:-5), open/ext: -12/-2
Scan time: 0.010
```

```
>>NSP10 SARS CoV-2 139 bp (139 aa)
  Waterman-Eggert score: 989; 200.8 bits; E(1) < 7.1e-57
  97.1% identity (99.3% similar) in 139 aa overlap (1-139:1-139)
```

```

      10      20      30      40      50      60
NSP10  AGNATEVPANSTVLSFCAFAVDPKAYKDYLASGGQPITNCVKMLCTHTGTGQAITVTPE
      : : : : : : : : : : : : : : : : : : : : : : : : : : : : : : : : : :
NSP10  AGNATEVPANSTVLSFCAFAVDAKAYKDYLASGGQPITNCVKMLCTHTGTGQAITVTPE
      10      20      30      40      50      60

      70      80      90     100     110     120
NSP10  ANMDQESFGGASCCLYCRCHIDHPNPKGFCDLKGKYVQIPTTCANDPVGFTLRNTVCTVC
      : : : : : : : : : : : : : : : : : : : : : : : : : : : : : : : : : :
NSP10  ANMDQESFGGASCCLYCRCHIDHPNPKGFCDLKGKYVQIPTTCANDPVGFTLKNVCTVC
      70      80      90     100     110     120

      130
NSP10  GMWKGYGCSCDQLREPLMQ
      : : : : : : : : : : : : : : : : : : : : : : : : : : : : : : : : : :
NSP10  GMWKGYGCSCDQLREPMLQ
      130
```

```
139 residues in 1 query sequences
139 residues in 1 library sequences
Scomplib [36.3.5e Nov, 2012(preload8)]
start: Sat May 9 00:09:58 2020 done: Sat May 9 00:09:58 2020
Total Scan time: 0.010 Total Display time: 0.000
```

Function used was LALIGN [36.3.5e Nov, 2012(preload8)]

## lalign output for NSP11 SARS COV vs. NSP11 SARS COV2

[EMBnet-Server] Date: Sat May 9 0:11:21 2020

---

```
# bin/lalign36 -E 10.0 -f -12 -g -2 5148.1.seq 5148.2.seq -J -K 3
LALIGN finds non-overlapping local alignments
  version 36.3.5e Nov, 2012(preload8)
Please cite:
  X. Huang and W. Miller (1991) Adv. Appl. Math. 12:373-381
```

```
Query: 5148.1.seq
      1>>>NSP11 SARS CoV 13 bp - 13 aa
Library: 5148.2.seq
        13 residues in      1 sequences
```

```
Statistics: (shuffled [500]) MLE statistics: Lambda= 0.2930; K=0.7519
  statistics sampled from 1 (1) to 500 sequences
Threshold: E() < 10 score: 9
Algorithm: Smith-Waterman (SSE2, Michael Farrar 2006) (7.2 Nov 2010)
Parameters: BL50 matrix (15:-5), open/ext: -12/-2
Scan time: 0.000
```

```
>>NSP11 SARS CoV-2 13 bp (13 aa)
  Waterman-Eggert score: 71; 30.4 bits; E(1) < 1.2e-07
84.6% identity (100.0% similar) in 13 aa overlap (1-13:1-13)
```

```

          10
NSP11  SADASTFLNGFAV
       ::::::::::::::
NSP11  SADAQSFLNGFAV
          10
```

```
13 residues in 1 query sequences
13 residues in 1 library sequences
Scomplib [36.3.5e Nov, 2012(preload8)]
start: Sat May 9 00:11:21 2020 done: Sat May 9 00:11:21 2020
Total Scan time: 0.000 Total Display time: 0.000
```

```
Function used was LALIGN [36.3.5e Nov, 2012(preload8)]
```

# lalign output for NSP12 SARS COV vs. NSP12 SARS COV2

[EMBnet-Server] Date: Sat May 9 0:13:30 2020

---

```
# bin/lalign36 -E 10.0 -f -12 -g -2 6675.1.seq 6675.2.seq -J -K 3
LALIGN finds non-overlapping local alignments
  version 36.3.5e Nov, 2012(preload8)
Please cite:
  X. Huang and W. Miller (1991) Adv. Appl. Math. 12:373-381
```

```
Query: 6675.1.seq
      1>>>NSP12 SARS CoV 932 bp - 932 aa
Library: 6675.2.seq
        932 residues in      1 sequences
```

```
Statistics: (shuffled [500]) MLE statistics: Lambda= 0.1584; K=0.01142
  statistics sampled from 1 (1) to 500 sequences
Threshold: E() < 10 score: 44
Algorithm: Smith-Waterman (SSE2, Michael Farrar 2006) (7.2 Nov 2010)
Parameters: BL50 matrix (15:-5), open/ext: -12/-2
Scan time: 0.160
```

```
>>NSP12 SARS CoV-2 932 bp (932 aa)
  Waterman-Eggert score: 6186; 1420.1 bits; E(1) < 0
96.4% identity (99.4% similar) in 932 aa overlap (1-932:1-932)
```

```
          10          20          30          40          50          60
NSP12  SADASTFLNRVCGVSAARLTPCGTGTSTDVVYRAFDIYNEKVAGFAKFLKTNCCRFQEKD
      :.....:
NSP12  SADAQSFLNRVCGVSAARLTPCGTGTSTDVVYRAFDIYNDKVAGFAKFLKTNCCRFQEKD
          10          20          30          40          50          60

          70          80          90         100         110         120
NSP12  EEGNLLDSYFVVKRHTMSNYQHEETIYNLVKDCPAVAVHDFFKFRVDGDMVPHISRQRLT
      :. ....:
NSP12  EDDNLIDSYFVVKRHTFSNYQHEETIYNLLKDCPAVAKHDFFKFRIDGDMVPHISRQRLT
          70          80          90         100         110         120

          130         140         150         160         170         180
NSP12  KYTMADLVYALRHFDEGNCDTLKEILVTYNCCDDDYFNKKDWYDFVENPDILRVYANLGE
      :.....:
NSP12  KYTMADLVYALRHFDEGNCDTLKEILVTYNCCDDDYFNKKDWYDFVENPDILRVYANLGE
          130         140         150         160         170         180

          190         200         210         220         230         240
NSP12  RVRQSLKKTQVQFCDAMRDAGIVGVLTLDNQDLNGNWDYDFGDFVQVAPGCGVPIVDSYYSL
      :.....:
NSP12  RVRQALLKKTQVQFCDAMRNAGIVGVLTLDNQDLNGNWDYDFGDFIQTTPGSGVPVVDYYSL
          190         200         210         220         230         240

          250         260         270         280         290         300
NSP12  LMPILTLTRALAAESHMDADLAKPLIKWDLLKYDFTEERLCLFDYFYKYWDQTYHPNCIN
      :.....:
NSP12  LMPILTLTRALTAESHVDTDLTKPYIKWDLLKYDFTEERLKLFDYFYKYWDQTYHPNCVN
```

|       |                                                               |     |     |     |     |     |
|-------|---------------------------------------------------------------|-----|-----|-----|-----|-----|
|       | 250                                                           | 260 | 270 | 280 | 290 | 300 |
|       | 310                                                           | 320 | 330 | 340 | 350 | 360 |
| NSP12 | CLDDRCILHCANFNVLVSTVFPPTSFGPLVRKIFVDGVPFVVSTGYHFRELGVVHNQDVN  |     |     |     |     |     |
| NSP12 | CLDDRCILHCANFNVLVSTVFPPTSFGPLVRKIFVDGVPFVVSTGYHFRELGVVHNQDVN  |     |     |     |     |     |
|       | 310                                                           | 320 | 330 | 340 | 350 | 360 |
|       | 370                                                           | 380 | 390 | 400 | 410 | 420 |
| NSP12 | LHSSRSLFKELLVYAADPAMHAASGNLLLDKRTTCFSVAALTNNVAFQTVKPGNFKDFY   |     |     |     |     |     |
| NSP12 | LHSSRSLFKELLVYAADPAMHAASGNLLLDKRTTCFSVAALTNNVAFQTVKPGNFKDFY   |     |     |     |     |     |
|       | 370                                                           | 380 | 390 | 400 | 410 | 420 |
|       | 430                                                           | 440 | 450 | 460 | 470 | 480 |
| NSP12 | DFAVSKGFFKEGSSVELKHFFFAQDGNAAISDYDYRYNLPTMCDIRQLLFVVEVVDKYF   |     |     |     |     |     |
| NSP12 | DFAVSKGFFKEGSSVELKHFFFAQDGNAAISDYDYRYNLPTMCDIRQLLFVVEVVDKYF   |     |     |     |     |     |
|       | 430                                                           | 440 | 450 | 460 | 470 | 480 |
|       | 490                                                           | 500 | 510 | 520 | 530 | 540 |
| NSP12 | DCYDGGCINANQVIVNNLDKSAGFPFNKWKARLYYDSMSYEDQDALFAYTKRNVIPITIT  |     |     |     |     |     |
| NSP12 | DCYDGGCINANQVIVNNLDKSAGFPFNKWKARLYYDSMSYEDQDALFAYTKRNVIPITIT  |     |     |     |     |     |
|       | 490                                                           | 500 | 510 | 520 | 530 | 540 |
|       | 550                                                           | 560 | 570 | 580 | 590 | 600 |
| NSP12 | QMNLKYAISAKNRARTVAGVSIKSTMTNRQFHQKLLKSIAATRQATVVIKTSKFGYGGWHN |     |     |     |     |     |
| NSP12 | QMNLKYAISAKNRARTVAGVSIKSTMTNRQFHQKLLKSIAATRQATVVIKTSKFGYGGWHN |     |     |     |     |     |
|       | 550                                                           | 560 | 570 | 580 | 590 | 600 |
|       | 610                                                           | 620 | 630 | 640 | 650 | 660 |
| NSP12 | MLKTVYSVDVETPHLMGWDPKCDRAMPNMLRIMASLVLARKHNTCCNLSHRFYRLANCA   |     |     |     |     |     |
| NSP12 | MLKTVYSVDVENPHLMGWDPKCDRAMPNMLRIMASLVLARKHNTCCNLSHRFYRLANCA   |     |     |     |     |     |
|       | 610                                                           | 620 | 630 | 640 | 650 | 660 |
|       | 670                                                           | 680 | 690 | 700 | 710 | 720 |
| NSP12 | QVLSEMVMCGGSLYVKPGGTSSGDATTAYANSVFNICQAVTANVNALLSTDGKNIADKYV  |     |     |     |     |     |
| NSP12 | QVLSEMVMCGGSLYVKPGGTSSGDATTAYANSVFNICQAVTANVNALLSTDGKNIADKYV  |     |     |     |     |     |
|       | 670                                                           | 680 | 690 | 700 | 710 | 720 |
|       | 730                                                           | 740 | 750 | 760 | 770 | 780 |
| NSP12 | RNLQHRLYECLYRNRDVEDHEFVDEFYAYLRKHFSMMILSDDAVVCYNSNYAAQGLVASIK |     |     |     |     |     |
| NSP12 | RNLQHRLYECLYRNRDVEDDFVNEFYAYLRKHFSMMILSDDAVVCFNSTYASQGLVASIK  |     |     |     |     |     |
|       | 730                                                           | 740 | 750 | 760 | 770 | 780 |
|       | 790                                                           | 800 | 810 | 820 | 830 | 840 |
| NSP12 | NFKAVLYYQNNVMSEAKCWTETDLTKGPHEFCSQHTMLVKQGDDYVYLPYPDPSPRILGA  |     |     |     |     |     |
| NSP12 | NFKSVLYYQNNVMSEAKCWTETDLTKGPHEFCSQHTMLVKQGDDYVYLPYPDPSPRILGA  |     |     |     |     |     |
|       | 790                                                           | 800 | 810 | 820 | 830 | 840 |
|       | 850                                                           | 860 | 870 | 880 | 890 | 900 |

```

NSP12  GCFVDDIVKTDGTLMIERFVSLAIDAYPLTKHPNQEYADVFLYLYQYIRKLHDELTHGML
      :.....:.....:.....:.....:.....:.....:.....:.....:.....:.....:.....:
NSP12  GCFVDDIVKTDGTLMIERFVSLAIDAYPLTKHPNQEYADVFLYLYQYIRKLHDELTHGML
      850      860      870      880      890      900

      910      920      930
NSP12  DMYSVMLTNDNTSRYWEPEFYEAMYPHTVLQ
      :.....:.....:.....:.....:.....:.....:.....:.....:.....:.....:
NSP12  DMYSVMLTNDNTSRYWEPEFYEAMYPHTVLQ
      910      920      930

```

```

>--
Waterman-Eggert score: 64; 21.1 bits; E(1) < 0.32
28.0% identity (72.0% similar) in 25 aa overlap (730-754:54-78)

```

```

      730      740      750
NSP12  CLYRNRDVDHEFVDEFYAYLRKHFS
      :.....:.....:.....:.....:.....:.....:.....:.....:.....:.....:
NSP12  CRFQEKDEDDNLIDSYFVVKRHTFS
      60      70

```

```

>--
Waterman-Eggert score: 54; 18.8 bits; E(1) < 0.85
25.9% identity (59.3% similar) in 27 aa overlap (193-219:139-165)

```

```

      200      210
NSP12  CDAMRDAGIVGVLTLDNQDLNGNWYDF
      :.....:.....:.....:.....:.....:.....:.....:.....:.....:.....:
NSP12  CDTLKEILVTYNCCDDYFNKKDWYDF
      140      150      160

```

```

932 residues in 1 query sequences
932 residues in 1 library sequences
Scomplib [36.3.5e Nov, 2012(preload8)]
start: Sat May 9 00:13:31 2020 done: Sat May 9 00:13:31 2020
Total Scan time: 0.160 Total Display time: 0.060

```

```

Function used was LALIGN [36.3.5e Nov, 2012(preload8)]

```

# lalign output for NSP13 SARS COV vs. NSP13 SARS COV2

[EMBnet-Server] Date: Sat May 9 0:15:03 2020

```
# bin/lalign36 -E 10.0 -f -12 -g -2 6675.1.seq 6675.2.seq -J -K 3
LALIGN finds non-overlapping local alignments
  version 36.3.5e Nov, 2012(preload8)
Please cite:
  X. Huang and W. Miller (1991) Adv. Appl. Math. 12:373-381
```

```
Query: 6675.1.seq
      1>>>NSP13 SARS CoV 601 bp - 601 aa
Library: 6675.2.seq
        601 residues in      1 sequences
```

```
Statistics: (shuffled [500]) MLE statistics: Lambda= 0.1728; K=0.02405
  statistics sampled from 1 (1) to 500 sequences
Threshold: E() < 10 score: 39
Algorithm: Smith-Waterman (SSE2, Michael Farrar 2006) (7.2 Nov 2010)
Parameters: BL50 matrix (15:-5), open/ext: -12/-2
Scan time: 0.070
```

```
>>NSP13 SARS CoV-2 601 bp (601 aa)
  Waterman-Eggert score: 4038; 1011.9 bits; E(1) < 0
99.8% identity (100.0% similar) in 601 aa overlap (1-601:1-601)
```

```
          10          20          30          40          50          60
NSP13  AVGACVLCNSQTSRLRCGACIRRPFLCCKCCYDHSVISTSHKLVLSVNPYVCNAPGCDVTDV
      :
NSP13  AVGACVLCNSQTSRLRCGACIRRPFLCCKCCYDHSVISTSHKLVLSVNPYVCNAPGCDVTDV
          10          20          30          40          50          60

          70          80          90         100         110         120
NSP13  TQLYLGGMSYYCKSHKPPISFPLCANGQVFGLYKNTCVGSDNVTDFNAIATCDWTNAGDY
      :
NSP13  TQLYLGGMSYYCKSHKPPISFPLCANGQVFGLYKNTCVGSDNVTDFNAIATCDWTNAGDY
          70          80          90         100         110         120

          130         140         150         160         170         180
NSP13  ILANTCTERLKLFAAETLKATEETFKLSYGIATVREVLSDRELHLSWEVGKPRPPLNRNY
      :
NSP13  ILANTCTERLKLFAAETLKATEETFKLSYGIATVREVLSDRELHLSWEVGKPRPPLNRNY
          130         140         150         160         170         180

          190         200         210         220         230         240
NSP13  VFTGYRVTKNSKVQIGEYTFEKGDYGDAVVYRGTTTTYKLVNGDYFVLTSHTVMPLSAPTL
      :
NSP13  VFTGYRVTKNSKVQIGEYTFEKGDYGDAVVYRGTTTTYKLVNGDYFVLTSHTVMPLSAPTL
          190         200         210         220         230         240

          250         260         270         280         290         300
NSP13  VPQEHYVRLTGLYPTLNISDEFSSNVANYQKVGMMQKYSTLQPPGTGKSHFAIGLALALYYP
      :
NSP13  VPQEHYVRLTGLYPTLNISDEFSSNVANYQKVGMMQKYSTLQPPGTGKSHFAIGLALALYYP
```

```

                250         260         270         280         290         300
                310         320         330         340         350         360
NSP13 SARIVYTACSHAAVDALCEKALKYLPIDKCSRIIPARARVECFDKFKVNSTLEQYVFCTV
      ::::::::::::::::::::::::::::::::::::::::::::::::::::::::::::::::::::
NSP13 SARIVYTACSHAAVDALCEKALKYLPIDKCSRIIPARARVECFDKFKVNSTLEQYVFCTV
                310         320         330         340         350         360

                370         380         390         400         410         420
NSP13 NALPETTADIVVFDEISMATNYDLSVVNARLRKHYVYIGDPAQLPAPRTLLTKGTLEPE
      ::::::::::::::::::::::::::::::::::::::::::::::::::::::::::::::::::::
NSP13 NALPETTADIVVFDEISMATNYDLSVVNARLRKHYVYIGDPAQLPAPRTLLTKGTLEPE
                370         380         390         400         410         420

                430         440         450         460         470         480
NSP13 YFNSVCRLMKTIGPDMFLGTCRRCPAEIVDTVSALVYDNKCLKAHKDKSAQCFKMFYKGV
      ::::::::::::::::::::::::::::::::::::::::::::::::::::::::::::::::::::
NSP13 YFNSVCRLMKTIGPDMFLGTCRRCPAEIVDTVSALVYDNKCLKAHKDKSAQCFKMFYKGV
                430         440         450         460         470         480

                490         500         510         520         530         540
NSP13 THDVSSAINRPQIGVVREFLTRNPAWRKAVFISPYNSQNAVASKILGLPTQTVDSSQGSE
      ::::::::::::::::::::::::::::::::::::::::::::::::::::::::::::::::::::
NSP13 THDVSSAINRPQIGVVREFLTRNPAWRKAVFISPYNSQNAVASKILGLPTQTVDSSQGSE
                490         500         510         520         530         540

                550         560         570         580         590         600
NSP13 YDYVIFTQTTETAHSCNVNRFNVAITRAKIGILCIMSDDRDLYDKLQFTSLEIPRRNVATL
      ::::::::::::::::::::::::::::::::::::::::::::::::::::::::::::::::::::
NSP13 YDYVIFTQTTETAHSCNVNRFNVAITRAKIGILCIMSDDRDLYDKLQFTSLEIPRRNVATL
                550         560         570         580         590         600

```

```

NSP13 Q
      :
NSP13 Q

```

```

>--
Waterman-Eggert score: 42; 15.8 bits; E(1) < 1
42.9% identity (78.6% similar) in 14 aa overlap (211-224:185-198)

```

```

                220
NSP13 YRGTTTYKLNVDY
      :: : . :.....:
NSP13 YRVTKNSKVQIGEY
                190

```

```

>--
Waterman-Eggert score: 42; 15.8 bits; E(1) < 1
42.9% identity (78.6% similar) in 14 aa overlap (185-198:211-224)

```

```

                190
NSP13 YRVTKNSKVQIGEY
      :: : . :.....:
NSP13 YRGTTTYKLNVDY
                220

```

601 residues in 1 query sequences  
601 residues in 1 library sequences  
Scomplib [36.3.5e Nov, 2012(preload8)]  
start: Sat May 9 00:15:04 2020 done: Sat May 9 00:15:04 2020  
Total Scan time: 0.070 Total Display time: 0.030  
  
Function used was LALIGN [36.3.5e Nov, 2012(preload8)]



# lalign output for NSP14 SARS COV vs. NSP14 SARS COV2

[EMBnet-Server] Date: Sat May 9 0:16:29 2020

---

# bin/lalign36 -E 10.0 -f -12 -g -2 6674.1.seq 6674.2.seq -J -K 3  
LALIGN finds non-overlapping local alignments  
version 36.3.5e Nov, 2012(preload8)  
Please cite:  
X. Huang and W. Miller (1991) Adv. Appl. Math. 12:373-381

Query: 6674.1.seq  
1>>>NSP14 SARS CoV 527 bp - 527 aa  
Library: 6674.2.seq  
527 residues in 1 sequences

Statistics: (shuffled [500]) MLE statistics: Lambda= 0.1674; K=0.0192  
statistics sampled from 1 (1) to 500 sequences  
Threshold: E() < 10 score: 38  
Algorithm: Smith-Waterman (SSE2, Michael Farrar 2006) (7.2 Nov 2010)  
Parameters: BL50 matrix (15:-5), open/ext: -12/-2  
Scan time: 0.060

>>NSP14 SARS CoV-2 527 bp (527 aa)  
Waterman-Eggert score: 3592; 873.2 bits; E(1) < 0  
95.1% identity (99.1% similar) in 527 aa overlap (1-527:1-527)

|       |      |       |      |        |       |       |
|-------|------|-------|------|--------|-------|-------|
|       | 10   | 20    | 30   | 40     | 50    | 60    |
| NSP14 | AENV | TGLF  | KDCS | KIIT   | GLHPT | QAPTH |
|       | 10   | 20    | 30   | 40     | 50    | 60    |
| NSP14 | AENV | TGLF  | KDCS | KVIT   | GLHPT | QAPTH |
|       | 70   | 80    | 90   | 100    | 110   | 120   |
| NSP14 | KMNY | QVNG  | YPNM | FITREE | AIRH  | VRAW  |
|       | 70   | 80    | 90   | 100    | 110   | 120   |
| NSP14 | KMNY | QVNG  | YPNM | FITREE | AIRH  | VRAW  |
|       | 130  | 140   | 150  | 160    | 170   | 180   |
| NSP14 | PTGY | VDTEN | NTEF | TRVNA  | KPPPG | DQFK  |
|       | 130  | 140   | 150  | 160    | 170   | 180   |
| NSP14 | PTGY | VDTEN | NTEF | TRVNA  | KPPPG | DQFK  |
|       | 190  | 200   | 210  | 220    | 230   | 240   |
| NSP14 | VVFL | VLAHG | FELT | SMKY   | FVKIG | PERT  |
|       | 190  | 200   | 210  | 220    | 230   | 240   |
| NSP14 | VVFL | VLAHG | FELT | SMKY   | FVKIG | PERT  |
|       | 250  | 260   | 270  | 280    | 290   | 300   |
| NSP14 | MIDV | QQWG  | FTGN | LQSN   | HDQHC | QVHG  |
|       | 250  | 260   | 270  | 280    | 290   | 300   |
| NSP14 | MIDV | QQWG  | FTGN | LQSN   | HDLYC | QVHG  |

```

                250      260      270      280      290      300
                310      320      330      340      350      360
NSP14 DELRVNSACRQVQHMVVKSAALLADKFPVLHDIGNPKAIKCVQAEVWKFYDAQPCSDKA
      .....
NSP14 DELKINAACRQVQHMVVKAAALLADKFPVLHDIGNPKAIKCVQADVEWKFYDAQPCSDKA
                310      320      330      340      350      360

                370      380      390      400      410      420
NSP14 YKIEELFYASYATHHDKFTDGVCLFWNCNVDRYPANAIVCRFDTRVLSNLNLPGCDGGSLY
      .....
NSP14 YKIEELFYASYATHSDKFTDGVCLFWNCNVDRYPANSIVCRFDTRVLSNLNLPGCDGGSLY
                370      380      390      400      410      420

                430      440      450      460      470      480
NSP14 VNKHAFHTPAFDKSAFTNLKQLPFFYYSDSPCESHGKQVVSDIDYVPLKSATCITRCNLG
      .....
NSP14 VNKHAFHTPAFDKSAFVNLKQLPFFYYSDSPCESHGKQVVSDIDYVPLKSATCITRCNLG
                430      440      450      460      470      480

                490      500      510      520
NSP14 GAVCRHHANEYRQYLDAYNMMISAGFSLWIYKQFDTYNLWNTFTRLQ
      .....
NSP14 GAVCRHHANEYRLYLDAYNMMISAGFSLWVYKQFDTYNLWNTFTRLQ
                490      500      510      520

```

>--

Waterman-Eggert score: 53; 18.5 bits; E(1) < 0.53  
 34.9% identity (62.8% similar) in 43 aa overlap (113-153:16-58)

```

                120      130      140      150
NSP14 TGVNLVAVPTGY-VDTENNTTEFTRVNAKPPPGDQ-FKHLIPLM
      .... . : : : : : : : : : : : : : : : : : : : : : : : : : : : :
NSP14 TGLHPTQAPTHLSVDTKFKTEGLCVDIPGIPKDMTYRRLISMM
                20      30      40      50

```

>--

Waterman-Eggert score: 47; 17.1 bits; E(1) < 0.87  
 22.0% identity (52.0% similar) in 50 aa overlap (469-517:212-260)

```

                470      480      490      500      510
NSP14 KSATCITRCNLGGAVCRHHANEYRQYLDAYNMMISA-GFSLWIYKQFDTY
      . : : : . . : : : . . . . . : : . . . : :
NSP14 RRATCFSTASDTYA-CWHHSIGFDYVYNPFMIDVQQWGFTGNLQSNHDLY
                220      230      240      250      260

```

527 residues in 1 query sequences  
 527 residues in 1 library sequences  
 Scomplib [36.3.5e Nov, 2012(preload8)]  
 start: Sat May 9 00:16:30 2020 done: Sat May 9 00:16:30 2020  
 Total Scan time: 0.060 Total Display time: 0.020

Function used was LALIGN [36.3.5e Nov, 2012(preload8)]

# lalign output for NSP15 SARS COV vs. NSP15 SARS COV2

[EMBnet-Server] Date: Sat May 9 0:17:55 2020

```
# bin/lalign36 -E 10.0 -f -12 -g -2 7450.1.seq 7450.2.seq -J -K 3
LALIGN finds non-overlapping local alignments
  version 36.3.5e Nov, 2012(preload8)
Please cite:
  X. Huang and W. Miller (1991) Adv. Appl. Math. 12:373-381
```

```
Query: 7450.1.seq
      1>>>NSP15 SARS CoV 346 bp - 346 aa
Library: 7450.2.seq
        346 residues in      1 sequences
```

```
Statistics: (shuffled [500]) MLE statistics: Lambda= 0.1879; K=0.03691
  statistics sampled from 1 (1) to 500 sequences
Threshold: E() < 10 score: 32
Algorithm: Smith-Waterman (SSE2, Michael Farrar 2006) (7.2 Nov 2010)
Parameters: BL50 matrix (15:-5), open/ext: -12/-2
Scan time: 0.020
```

```
>>NSP15 SARS CoV-2 346 bp (346 aa)
  Waterman-Eggert score: 2086; 570.1 bits; E(1) < 2.9e-167
88.7% identity (97.7% similar) in 346 aa overlap (1-346:1-346)
```

```

      10      20      30      40      50      60
NSP15  SLENVAYNVVNKGFHFDGHAGEAPVSIINNAVYTKVDGIDVEIFENKTTLPVNVAFELWAK
      .....
NSP15  SLENVAFNVVNKGFHFDGQQGEVPSIINNTVYTKVDGVDVELFENKTTLPVNVAFELWAK
      10      20      30      40      50      60

      70      80      90     100     110     120
NSP15  RNIKPVPEIKILNNLGVVDIAANTVIWDYKREAPAHVSTIGVCTMTDIAKKPTESACSSLT
      .....
NSP15  RNIKPVPEVKILNNLGVVDIAANTVIWDYKRDAPAHISTIGVCSMTDIAKKPTETICAPLT
      70      80      90     100     110     120

      130     140     150     160     170     180
NSP15  VLFDRVREGQVDLFRNARNGVLITEGSVKGLTPSKGPAQASVNGVTLIGESVKTFQFNYFK
      .....
NSP15  VFFDGRVDGQVDLFRNARNGVLITEGSVKGLQPSVGPQASLNGVTLIGEAVKTFQFNYYK
      130     140     150     160     170     180

      190     200     210     220     230     240
NSP15  KVDGIIQQLPETYFTQSRDLEDFKPRSQMETDFLELAMDEFIQRYKLEGYAFEHIVYGDF
      .....
NSP15  KVDGVVQQLPETYFTQSRNLQEFKPRSQMEIDFLELAMDEFIERYKLEGYAFEHIVYGDF
      190     200     210     220     230     240

      250     260     270     280     290     300
NSP15  SHGQLGGLHLMIGLAKRSQDSPLKLEDFIPMDSTVKNYFITDAQTGSSKCVCSVIDLLLD
      .....
NSP15  SHSQLGGLHLLIGLAKRFKESPFELEDFIPMDSTVKNYFITDAQTGSSKCVCSVIDLLLD
```

```
                250         260         270         280         290         300
                310         320         330         340
NSP15  DFVEIIKSQDLSVISKVVKVTIDYAEISFMLWCKDGHVETFYPKLQ
       ::::::::::::::::::::::::::::::::::::::::::::::::::::
NSP15  DFVEIIKSQDLSVSVSKVVKVTIDYTEISFMLWCKDGHVETFYPKLQ
                310         320         330         340
```

>--

Waterman-Eggert score: 54; 19.4 bits; E(1) < 0.16  
31.2% identity (56.2% similar) in 32 aa overlap (97-128:273-304)

```
                100         110         120
NSP15  STIGVCTMTDIAKKPTESACSSLTVLFDGRVE
       :. . . . . :. . . . . :. . . . . :. . . . . :
NSP15  STVKNYFITDAQTGSSKCVCSVIDLLLLDFVE
                280         290         300
```

>--

Waterman-Eggert score: 48; 17.8 bits; E(1) < 0.41  
25.6% identity (64.1% similar) in 39 aa overlap (167-205:236-270)

```
                170         180         190         200
NSP15  LIGESVKTQFNFYFKKVDGIIQQLPETYFTQSRDLEDFKP
       . :. . . . . :. . . . . :. . . . . :. . . . . :
NSP15  VYGDFSHSQLGGLHLLIQLAKRFKESPF----ELEDIFIP
                240         250         260         270
```

346 residues in 1 query sequences  
346 residues in 1 library sequences  
Scomplib [36.3.5e Nov, 2012(preload8)]  
start: Sat May 9 00:17:56 2020 done: Sat May 9 00:17:56 2020  
Total Scan time: 0.020 Total Display time: 0.020

Function used was LALIGN [36.3.5e Nov, 2012(preload8)]

Readseq version 2.1.30 (12-May-2010) Readseq version 2.1.30 (12-May-2010)

## lalign output for NSP16 SARS COV vs. NSP16 SARS COV2

[EMBnet-Server] Date: Sat May 9 14:40:56 2020

```
# bin/lalign36 -E 10.0 -f -12 -g -2 16523.1.seq 16523.2.seq -J -K 3
LALIGN finds non-overlapping local alignments
  version 36.3.5e Nov, 2012(preload8)
Please cite:
  X. Huang and W. Miller (1991) Adv. Appl. Math. 12:373-381
```

```
Query: 16523.1.seq
      1>>>NSP16 SARS CoV 298 bp - 298 aa
Library: 16523.2.seq
        298 residues in      1 sequences
```

```
Statistics: (shuffled [500]) MLE statistics: Lambda= 0.1873; K=0.0366
  statistics sampled from 1 (1) to 500 sequences
Threshold: E() < 10 score: 31
Algorithm: Smith-Waterman (SSE2, Michael Farrar 2006) (7.2 Nov 2010)
Parameters: BL50 matrix (15:-5), open/ext: -12/-2
Scan time: 0.020
```

```
>>NSP16 SARS CoV-2 298 bp (298 aa)
  Waterman-Eggert score: 1902; 518.7 bits; E(1) < 6.5e-152
  93.3% identity (99.0% similar) in 298 aa overlap (1-298:1-298)
```

```

      10      20      30      40      50      60
NSP16 ASQAWQPGVAMPNLYKMQRMLLEKCDLQNYGENAVIPKGIMMNVAKYTQLCQYLNTLTLA
      .....
NSP16 SSQAWQPGVAMPNLYKMQRMLLEKCDLQNYGDSATLPKGIMMNVAKYTQLCQYLNTLTLA
      10      20      30      40      50      60

      70      80      90     100     110     120
NSP16 VPYNMRVIHFGAGSDKGVAPGTAVLRQWLPTGTLVDSDLNDFVSDADSTLIGDCATVHT
      .....
NSP16 VPYNMRVIHFGAGSDKGVAPGTAVLRQWLPTGTLVDSDLNDFVSDADSTLIGDCATVHT
      70      80      90     100     110     120

      130     140     150     160     170     180
NSP16 ANKWDLIISDMYDPRTKHVTKENDSKEGFFTYLCGFIKQKLALGGSIAVKITEHSWNADL
      .....
NSP16 ANKWDLIISDMYDPKTKNVTKENDSKEGFFTYICGFIQKQKLALGGSVAIKITEHSWNADL
      130     140     150     160     170     180

      190     200     210     220     230     240
NSP16 YKLMGHFSWWTAFVTNVNASSEAFBIGANYLGKPKQIDGYTMHANYIFWRNTNPIQLS
      .....
NSP16 YKLMGHFAWWTAFVTNVNASSEAFBIGNYLGKPREQIDGYVMHANYIFWRNTNPIQLS
      190     200     210     220     230     240

      250     260     270     280     290
NSP16 SYSLFDMSKFPLKLRGTAVMSLKENQINDMIYSLLEKGRLLIIRENNRVVSSDILVNN
```

```
..... : : .....
NSP16  SYSLFDMSKFPLKLRGTAVMSLKEGQINDMILSLLSKGRLIIRENNRVVISSDVLVNN
          250      260      270      280      290
```

>--

Waterman-Eggert score: 42; 16.1 bits; E(1) < 0.71  
29.2% identity (75.0% similar) in 24 aa overlap (252-275:161-184)

```
          260      270
NSP16  LKLRGTAVMSLKENQINDMIYSL
      : : ..... : : .....
NSP16  LALGGSVAIKITEHSWNADLYKLM
          170      180
```

>--

Waterman-Eggert score: 36; 14.5 bits; E(1) < 0.98  
26.5% identity (58.8% similar) in 34 aa overlap (74-107:1-34)

```
          80      90      100
NSP16  SDKGVAPGTAVLRQWLPTGTLVDSDLNDFVSDA
      .... : : : . : : : : : : : : : : :
NSP16  SSQAWQPGVAMPNLYKMQRMLLEKCDLQNYGDSA
          10      20      30
```

298 residues in 1 query sequences  
298 residues in 1 library sequences  
Scomplib [36.3.5e Nov, 2012(preload8)]  
start: Sat May 9 14:40:57 2020 done: Sat May 9 14:40:57 2020  
Total Scan time: 0.020 Total Display time: 0.010

Function used was LALIGN [36.3.5e Nov, 2012(preload8)]

# lalign output for S PROTEIN SARS COV vs. S PROTEIN SARS COV2

[EMBnet-Server] Date: Sat May 9 0:27:26 2020

```
# bin/lalign36 -E 10.0 -f -12 -g -2 5148.1.seq 5148.2.seq -J -K 3
LALIGN finds non-overlapping local alignments
version 36.3.5e Nov, 2012(preload8)
Please cite:
X. Huang and W. Miller (1991) Adv. Appl. Math. 12:373-381
```

```
Query: 5148.1.seq
1>>>S Protein SARS CoV 1255 bp - 1255 aa
Library: 5148.2.seq
1273 residues in 1 sequences
```

```
Statistics: (shuffled [500]) MLE statistics: Lambda= 0.1533; K=0.008311
statistics sampled from 1 (1) to 500 sequences
Threshold: E() < 10 score: 47
Algorithm: Smith-Waterman (SSE2, Michael Farrar 2006) (7.2 Nov 2010)
Parameters: BL50 matrix (15:-5), open/ext: -12/-2
Scan time: 0.250
```

```
>>S Protein SARS CoV-2 1273 bp (1273 aa)
Waterman-Eggert score: 6655; 1478.7 bits; E(1) < 0
76.0% identity (91.5% similar) in 1277 aa overlap (1-1255:1-1273)
```

```

      10      20      30      40      50      60
S  MFIFLLFLTLTSGSDLDRCTTFDDVQAPNYTQHTSSMRGVYYPDEIFRSDTLYLTQDLFL
   ::::: : : : : : : : : : : : : : : : : : : : : : : : : : : : : : : : :
S  MFVFLVLLPLVSSQCVNLTTRTQ--LPPAYTN--SFTRGVYYPDKVFRSSVLHSTQDLFL
      10      20      30      40      50

      70      80      90     100     110
S  PFYSNVTGFHTIN-----HTFGNPVIFPKDGIYFAATEKSNVVRGWVFGSTMNKSQS
   ::::: : : : : : : : : : : : : : : : : : : : : : : : : : : : : : : : :
S  PFFSNVTWFHAIHVSGTNGTKRFDNPVLPFNDGVYFASTEKSNIIIRGWIFGTTLDSKTQS
      60      70      80      90     100     110

      120     130     140     150     160
S  VIIIINNSTNVVIRACNFELCDNPFQFAV----SKPMGTQHTMIFDNAFNCTFEYISDAFS
   ..... : : : : : : : : : : : : : : : : : : : : : : : : : : : : : : : :
S  LLIVNNTNVVIVKVEFQFCNDPFLGVYYHKNNKSWMESEFRVYSSANNCTFEYVSQPFL
      120     130     140     150     160     170

      170     180     190     200     210     220
S  LDVSEKSGNFKHLREFVFKNKDGFYVYKGYQPIDVVRDLPSGFNTLKPIFKLPLGINIT
   .. : : : : : : : : : : : : : : : : : : : : : : : : : : : : : : : :
S  MDLEGKQGNFKNLREFVFKNIDGYFKIYSKHTPINLVRDLPPQGFSALEPLVDLPIGINIT
      180     190     200     210     220     230

      230     240     250     260     270     280
S  NFRAIL----TAFSPAQDI--WGTSAAAYFVGYLKPTTFMLKYDENGITITDAVDCSQNPL
   : : : : : : : : : : : : : : : : : : : : : : : : : : : : : : : :
S  RFQTLALHRSYLTPGDSSSGWTAGAAAYVGYLQPRTFLLKYNENGTITDAVDCALDPL
```

```

240      250      260      270      280      290
      290      300      310      320      330      340
S  AELKCSVKSF EIDKGIYQTSNFRVVP SGDVVRFPNITNLCPFGEVFNATKFPSVYAWERK
  . : : : : : : : : : : : : : : : : : : : : : : : : : : : : : : : : : : :
S  SETKCTLKSFTVEKGIYQTSNFRVQPTESIVRFPNITNLCPFGEVFNATRFASVYAWNRRK
      300      310      320      330      340      350
      350      360      370      380      390      400
S  KISNCVADYSVLYNSTFFSTFKCYGVSATKLNLDLCFSNVYADSFVVKGDDVRQIAPGQTG
  . : : : : : : : : : : : : : : : : : : : : : : : : : : : : : : : : : :
S  RISNCVADYSVLYNSASFSTFKCYGVSPTKLNLDLCFTNVYADSFVIRGDEVQRQIAPGQTG
      360      370      380      390      400      410
      410      420      430      440      450      460
S  VIADYNYKLPDDFMGCVLAWNTRNIDATSTGNYNYKYRYLRHGKLRPFERDISNVPFSPD
  . : : : : : : : : : : : : : : : : : : : : : : : : : : : : : : : : : .
S  KIADYNYKLPDDFTGCVIAWNSNNLDSKVGGNYNLYRFRKSNLKPFERDISTEIQAG
      420      430      440      450      460      470
      470      480      490      500      510      520
S  GKPCTP-PALNCYWPLNDYGFYTTTIGIGYQPYRVVVL SFELLNAPATVCGPKLSTDLIKN
  . : : . : : : : : : : : : : : : : : : : : : : : : : : : : : : : : : :
S  STPCNGVEGFNCYFPLQSYGFQPTNGVGYQPYRVVVL SFELLHAPATVCGPKKSTNLVKN
      480      490      500      510      520      530
      530      540      550      560      570      580
S  QCVNFNFNGLTGTGVLTPSSKRFPFPQQFGRDVSDFTDSVRDPKTSEILDISPCAFGGVS
  . : : : : : : : : : : : : : : : : : : : : : : : : : : : : : : : : : .
S  KCVNFNFNGLTGTGVLTESNKKFLPFQFGRDIADTTDAVRDPQTL EILDITPCSFGGVS
      540      550      560      570      580      590
      590      600      610      620      630      640
S  VITPGTNASSEVAVLYQDVNCTDVSTAIHADQLTPAWRIYSTGNNVFQTAGCLIGAEHV
  . : : : : : : : : : : : : : : : : : : : : : : : : : : : : : : : : : .
S  VITPGTNTSNQAVVLYQDVNCTEVPVAIHADQLTPTWRVYSTGSNVFQTRAGCLIGAEHV
      600      610      620      630      640      650
      650      660      670      680      690
S  DTSYECDIPIGAGICASYHTVS----LLRSTSQKSIVAYTMSLGADSSIAYSNNTIAIPT
  . : : : : : : : : : : . : : : : : : : : : : : : : : : : : : : : : :
S  NNSYECDIPIGAGICASYQTQTNSPRRARSVASQSIIAYTMSLGAENSVAYSNNNSIAIPT
      660      670      680      690      700      710
700      710      720      730      740      750
S  NFSISITTEVMPVSMKTSVDCNMYICGDSTECANLLLQYGSFCTQLNRALSGIAAEQDR
  . : : : : : : : : : : : : : : : : : : : : : : : : : : : : : : : : .
S  NFTISVTTEILPVSMTKTSVDCTMYICGDSTECANLLLQYGSFCTQLNRALTGIHAVEQDK
      720      730      740      750      760      770
      760      770      780      790      800      810
S  NTREVFAQVKQMYKTPTLKYFGGFNFSQILPDKPKTKRSFIEDLLFNKVTLDAGFMKQ
  . : : : : : : : : : . : : : : : : : : : : : : : : : : : : : : : :
S  NTQEVFAQVKQIYKTPPIKDFGGFNFSQILPDPSKPSKRSFIEDLLFNKVTLDAGFIKQ
      780      790      800      810      820      830
820      830      840      850      860      870

```



```

S      YGEC LGDINARDL ICAQKFNGLTVLPPLLTDDMIAAYTAALVSGTATAGWTFGAGAALQI
      :::::::::: :::::::::: :::::::::: :::::::::: :::::::::: ::::::::::
S      YGDCLGDIAARDL ICAQKFNGLTVLPPLLTDEMI AQYTSALLAGTITSGWTFGAGAALQI
      840      850      860      870      880      890

      880      890      900      910      920      930
S      PFAMQMAYRFNGIGV TQNVLYENQKQIANQFNK AISQIQESLTTTSTALGKLDVVNQNA
      :::::::::: :::::::::: :::::::::: :::::::::: :::::::::: ::::::::::
S      PFAMQMAYRFNGIGV TQNVLYENQKLIANQFN SAIGKIQDSLSTASALGKLDVVNQNA
      900      910      920      930      940      950

      940      950      960      970      980      990
S      QALNTLVKQLSSNF GAISSVLNDILSRDKVEAEVQIDRLITGRLQSLQTYVTQQLIRAA
      :::::::::: :::::::::: :::::::::: :::::::::: :::::::::: ::::::::::
S      QALNTLVKQLSSNF GAISSVLNDILSRDKVEAEVQIDRLITGRLQSLQTYVTQQLIRAA
      960      970      980      990      1000      1010

      1000      1010      1020      1030      1040      1050
S      EIRASANLAATKMSE CVLQGSKRVDFCGKGYHLMSFPQAAPHG VVFLHV TYVPSQERNFT
      :::::::::: :::::::::: :::::::::: :::::::::: :::::::::: ::::::::::
S      EIRASANLAATKMSE CVLQGSKRVDFCGKGYHLMSFPQSAPHG VVFLHV TYVPAQEK NFT
      1020      1030      1040      1050      1060      1070

      1060      1070      1080      1090      1100      1110
S      TAPAICHEGKAYFP REGVVFVNGT SWFITQRNFFSPQIITTDN TFVSGNCDVVIGIINNT
      :::::::::: :::::::::: :::::::::: :::::::::: :::::::::: ::::::::::
S      TAPAICH DGKAHFPR EGVFVSNG THW FVTQRNFYEPQIITTDN TFVSGNCDVVIGI V NNT
      1080      1090      1100      1110      1120      1130

      1120      1130      1140      1150      1160      1170
S      VYDPLQPELDSFKEE LDKYFKNHTSPDV DLGDISGINASVVNIQKEIDRLNEVAKNLNES
      :::::::::: :::::::::: :::::::::: :::::::::: :::::::::: ::::::::::
S      VYDPLQPELDSFKEE LDKYFKNHTSPDV DLGDISGINASVVNIQKEIDRLNEVAKNLNES
      1140      1150      1160      1170      1180      1190

      1180      1190      1200      1210      1220      1230
S      LIDLQELGKYEQYI KW P WYVWLGF IAGLIAIVMVTILLCCMTSCC SCLKGACSCGSCCKF
      :::::::::: :::::::::: :::::::::: :::::::::: :::::::::: ::::::::::
S      LIDLQELGKYEQYI KW P WYIWLGF IAGLIAIVMVTIMLCCMTSCC SCLKGCCSCGSCCKF
      1200      1210      1220      1230      1240      1250

      1240      1250
S      DEDDSEPV LKG V KLHYT
      :::::::::: ::::::::::
S      DEDDSEPV LKG V KLHYT
      1260      1270

```

>--

Waterman-Eggert score: 91; 27.0 bits; E(1) < 0.012  
25.4% identity (55.3% similar) in 114 aa overlap (1121-1230:1146-1253)

```

      1130      1140      1150      1160      1170
S      DPLQPELDS-FKEE LDKYFKNHTSPDV DLGDISGINASVVNIQKEIDRLNEVAKNLNESL
      : .. :::: :::: . . . . . . . . . . . . . . . . . . . . . . . . .
S      DSFKEE LDKYFKNHTSPDV DLGDISGIN-ASVVNIQKEIDRLNEVAKNLNESLIDLQE-L
      1150      1160      1170      1180      1190      1200

```

```

1180      1190      1200      1210      1220      1230
S      IDLQELGKYEQYIKWPWYVWLGFIAGLIAIVMVTILL-CC--MTSCCSCLKGAC
      ..  ::  ::  :  ..  ::::  ...  ...  .  ::  .  :::::  :::
S      GKYEQYIKWPWYI-WLGF-AGLIAIVMVTIMLCCMTSCCSCLKGCCSC--GSC
      1210      1220      1230      1240      1250

```

>--

Waterman-Eggert score: 88; 26.4 bits; E(1) < 0.018  
19.1% identity (51.2% similar) in 330 aa overlap (924-1236:928-1248)

```

      930      940      950      960      970
S      STALGKLQDVVNQNAQALNTLVKQLSSNFGAISSVLNDILSRLDKVEAEVQ--IDRL--I
      .....: .....: .....: .....: .....: .....: .....:
S      NSAIGKIQDLSSTASALGKLQDVVNQNAQALNTLVKQLSSNFGAISSVLNDILSRLDKV
      930      940      950      960      970      980

```

```

      980      990      1000      1010      1020      1030
S      TGRLOSLQTYVTQQLIRAAEIRASANLAATKMSECVLGQSKRVDFCGKGY-HLMSFPQAA
      ....: ..  ::  ::  ..  .  :...  .  .  .  :  :  .  .  :  .
S      EAEVQ-IDRLITGRLQSLQTYVTQQLIRAAEIRASANLAATKMSECVLGQSKRVDFCGKG
      990      1000      1010      1020      1030      1040

```

```

      1040      1050      1060      1070      1080      1090
S      PHGVVFLHVTYVPSQERNFTTAPAICHEGKAYFPREGVVFVNGTSWFITQRNFFSP---Q
      :  .  :  .  .  .  .  :  ::  .  :  .  .  :  .  :  :  :
S      YHLMSFPQSAPHGVVFLHVTYVPA---QEKNFTTAPAICHGKAHFPREGVVFVSNQTHW
      1050      1060      1070      1080      1090      1100

```

```

      1100      1110      1120      1130      1140      1150
S      IITDNTF---VSGNCDVIGIINNTVYDPLQPELDSFKEELDKYFKNHTSPDVLGDI
      ..:  :  .  .  .  :  :  .  .  .  :  .  :  :  :  :  .
S      FVTQRNFYEQIITDNTFVSGNCDVIGIVNNTVYDPLQPELDS-FKEELDKYFKNHTS
      1110      1120      1130      1140      1150      1160

```

```

      1160      1170      1180      1190      1200
S      SGIN-ASVVNIQKEIDRLNEVAKNLNESLIDLQE-LGKYEQYIKWPWYV-WLGF-AGLI
      ..  ...  :  .  .  .  :  :  :  :  :  .  .  :  .  :  :  :  :
S      PDVDLGDISGINASVVNIQKEIDRLNEVAKNLNESLIDLQELGKYEQYIKWPWYIWLGF-
      1170      1180      1190      1200      1210      1220

```

```

      1210      1220      1230
S      AIVMVTILLCCMTSCCSCLKGACSC-GSCC
      :  ...  ...  :  ::  .  .  :  :  :  :
S      AGLIAIVMVTIML-CC--MTSCCSCLKGCC
      1230      1240

```

1255 residues in 1 query sequences  
1273 residues in 1 library sequences  
Scomplib [36.3.5e Nov, 2012(preload8)]  
start: Sat May 9 00:27:27 2020 done: Sat May 9 00:27:27 2020  
Total Scan time: 0.250 Total Display time: 0.100

Function used was LALIGN [36.3.5e Nov, 2012(preload8)]

# lalign output for ORF3A SARS COV vs. ORF3A SARS COV2

[EMBnet-Server] Date: Sat May 9 0:29:57 2020

```
# bin/lalign36 -E 10.0 -f -12 -g -2 7505.1.seq 7505.2.seq -J -K 3
LALIGN finds non-overlapping local alignments
version 36.3.5e Nov, 2012(preload8)
Please cite:
X. Huang and W. Miller (1991) Adv. Appl. Math. 12:373-381
```

```
Query: 7505.1.seq
1>>>ORF3a SARS CoV 274 bp - 274 aa
Library: 7505.2.seq
275 residues in 1 sequences
```

```
Statistics: (shuffled [500]) MLE statistics: Lambda= 0.1964; K=0.05612
statistics sampled from 1 (1) to 500 sequences
Threshold: E() < 10 score: 31
Algorithm: Smith-Waterman (SSE2, Michael Farrar 2006) (7.2 Nov 2010)
Parameters: BL50 matrix (15:-5), open/ext: -12/-2
Scan time: 0.020
```

```
>>ORF3a SARS CoV-2 275 bp (275 aa)
Waterman-Eggert score: 1381; 395.4 bits; E(1) < 7.1e-115
72.4% identity (90.2% similar) in 275 aa overlap (1-274:1-275)
```

```

      10      20      30      40      50      60
ORF3a MDLFMRFFTLRSITAQPVKIDNASPASTVHATATIPLQASLPFGWLVIGVAFLAVFQSAT
      .....  . . . : ..... :.....:.....:.....:.....:.....:.....
ORF3a MDLFMRIFTIGTVTLKQGEIKDATPSDFVRATATIPIQASLPFGWLIVGVALLAVFQSAS
      10      20      30      40      50      60

      70      80      90      100     110     120
ORF3a KIIALNKRWQLALYKGFQFICNLLLLFVTIYSHLLLVAAGMEAQFLYLYALIYFLQCINA
      .....:.....: : .....:.....: :.....:.....: :.....:.....: :
ORF3a KIITLKKRWQLALSkgVHFVCNLLLLFVTIVYSHLLLVAAGLEAPFLYLYALVYFLQSINF
      70      80      90      100     110     120

      130     140     150     160     170     180
ORF3a CRIIMRCWLCWKCKSKNPLLYDANYFVCWHTHNYDYCIPYNSVTDITIVVTEGDGISTPKL
      .....:.....:.....:.....: :.....:.....: :.....:.....: :.....:
ORF3a VRIIMRLWLCWKCRSKNPLLYDANYFLCWHTNCDYDYCIPYNSVTSSIVITSGDGTTPIS
      130     140     150     160     170     180

      190     200     210     220     230     240
ORF3a KEDYQIGGYSedrHSGVKDYVVVHGyfTEVYYQLESTQITTDGTGIENATFFIFNKLKVDP
      .....:.....: :.....: :.....: :.....: :.....: :.....: :.....:
ORF3a EHDYQIGGyTEKwESGVKDCVVLHsYFTSDYYQLYSTQLSTDTGVEHVTFfiYnkIVDEP
      190     200     210     220     230     240

      250     260     270
ORF3a P-NVQIHTIDGSSGVANPAMDPIYDEPTTTTSVPL
      .....:.....:.....:.....: :.....:.....: :.....:.....: :.....:
ORF3a EEHVQIHTIDGSSGVVNPVMEPIYDEPTTTTSVPL
```

250 260 270

>--

Waterman-Eggert score: 41; 15.8 bits; E(1) < 0.74  
28.9% identity (46.7% similar) in 45 aa overlap (42-81:104-148)

```
          50          60          70          80
ORF3a  PFGWLVIGVAFLAVFQSATKIIALNKRWQLA-----LYKGFQFIC
      :: ::  : ::  .. .  :. :  :.  :: .  :::
ORF3a  PFLYLYALVYFLQSIINFVRIIMRLWLCWKCRSKNPLLYDANYFLC
      110          120          130          140
```

>--

Waterman-Eggert score: 38; 14.9 bits; E(1) < 0.91  
75.0% identity (75.0% similar) in 4 aa overlap (127-130:130-133)

```
          130
ORF3a  CWLC
      :: :
ORF3a  CWKC
      130
```

274 residues in 1 query sequences

275 residues in 1 library sequences

Scomplib [36.3.5e Nov, 2012(preload8)]

start: Sat May 9 00:29:57 2020 done: Sat May 9 00:29:57 2020

Total Scan time: 0.020 Total Display time: 0.000

Function used was LALIGN [36.3.5e Nov, 2012(preload8)]

# lalign output for E PROTEIN SARS COV vs. E PROTEIN SARS COV2

[EMBnet-Server] Date: Sat May 9 0:31:33 2020

---

```
# bin/lalign36 -E 10.0 -f -12 -g -2 7505.1.seq 7505.2.seq -J -K 3
LALIGN finds non-overlapping local alignments
  version 36.3.5e Nov, 2012(preload8)
Please cite:
  X. Huang and W. Miller (1991) Adv. Appl. Math. 12:373-381
```

```
Query: 7505.1.seq
      1>>>E Protein SARS CoV 76 bp - 76 aa
Library: 7505.2.seq
        75 residues in      1 sequences
```

```
Statistics: (shuffled [500]) MLE statistics: Lambda= 0.1595; K=0.09062
  statistics sampled from 1 (1) to 500 sequences
Threshold: E() < 10 score: 25
Algorithm: Smith-Waterman (SSE2, Michael Farrar 2006) (7.2 Nov 2010)
Parameters: BL50 matrix (15:-5), open/ext: -12/-2
Scan time: 0.000
```

```
>>E Protein SARS CoV-2 75 bp (75 aa)
  Waterman-Eggert score: 431; 102.7 bits; E(1) < 7.1e-28
94.7% identity (97.4% similar) in 76 aa overlap (1-76:1-75)
```

```

      10      20      30      40      50      60
E      MYSFVSEETGTLIVNSVLLFLAFVVFLLVTLAILTALRLCAYCCNIVNVS�VKPTVYVYS
      : : : : : : : : : : : : : : : : : : : : : : : : : : : : : : : : : :
E      MYSFVSEETGTLIVNSVLLFLAFVVFLLVTLAILTALRLCAYCCNIVNVS�VKPSFYVYS
      10      20      30      40      50      60

      70
E      RVKNLNSSEGVPDLLV
      : : : : : : : : : : : : : : : : : : : : : : : : : : : : : : : : : :
E      RVKNLNSR-VPDLLV
      70
```

```
>--
  Waterman-Eggert score: 43; 13.4 bits; E(1) < 0.42
27.6% identity (51.7% similar) in 29 aa overlap (21-49:18-46)
```

```

      30      40
E      LAFVVFLLVTLAILTALRLCAYCCNIVNV
      : : : : : : : : : : : : : : : : : : : : : : : : : : : : : : : : : :
E      LLFLAFVVFLLVTLAILTALRLCAYCCNI
      20      30      40
```

```
>--
  Waterman-Eggert score: 43; 13.4 bits; E(1) < 0.42
27.6% identity (51.7% similar) in 29 aa overlap (18-46:21-49)
```

```

      20      30      40
E      LLFLAFVVFLLVTLAILTALRLCAYCCNI
```

```
      : ..... :. :. :      :      :.
E     LAFVVFLLVTLAILTALRLCAYCCNIVNV
           30           40
```

76 residues in 1 query sequences

75 residues in 1 library sequences

Scomplib [36.3.5e Nov, 2012(preload8)]

start: Sat May 9 00:31:33 2020 done: Sat May 9 00:31:33 2020

Total Scan time: 0.000 Total Display time: 0.010

Function used was LALIGN [36.3.5e Nov, 2012(preload8)]

# lalign output for MEMBRANE PROTEIN SARS COV vs. MEMBRANE PROTEIN SARS COV2

[EMBnet-Server] Date: Sat May 9 0:33:11 2020

```
# bin/lalign36 -E 10.0 -f -12 -g -2 6674.1.seq 6674.2.seq -J -K 3
LALIGN finds non-overlapping local alignments
  version 36.3.5e Nov, 2012(preload8)
Please cite:
  X. Huang and W. Miller (1991) Adv. Appl. Math. 12:373-381
```

```
Query: 6674.1.seq
  1>>>Membrane Protein SARS CoV 221 bp - 221 aa
Library: 6674.2.seq
  222 residues in      1 sequences
```

```
Statistics: (shuffled [500]) MLE statistics: Lambda= 0.1683; K=0.02984
  statistics sampled from 1 (1) to 500 sequences
Threshold: E() < 10 score: 30
Algorithm: Smith-Waterman (SSE2, Michael Farrar 2006) (7.2 Nov 2010)
Parameters: BL50 matrix (15:-5), open/ext: -12/-2
Scan time: 0.010
```

```
>>Membrane Protein SARS CoV-2 222 bp (222 aa)
  Waterman-Eggert score: 1344; 331.3 bits; E(1) < 9.1e-96
  90.5% identity (98.2% similar) in 222 aa overlap (1-221:1-222)
```

```

      10      20      30      40      50
Membra MAD-NGTITVEELKQLLEQWNLVIGFLFLAWIMLLQFAYSNRNRFLYIIKLVFLWLLWPV
      ::::::::::::::::::::::::::::::::::::::::::::::::::::::::::::::
Membra MADSNGTITVEELKLLLEQWNLVIGFLFLTWICLLQFAYANRNRFYIIKLI FLWLLWPV
      10      20      30      40      50      60

      60      70      80      90      100     110
Membra TLACFVLAAYRINWVTGGIAIAMACIVGLMWLSYFVASFRLFARTRSMWSFNPETNILL
      ::::::::::::::::::::::::::::::::::::::::::::::::::::::::::::::
Membra TLACFVLAAYRINWITGGIAIAMACLVGLMWLSYFIASFRLFARTRSMWSFNPETNILL
      70      80      90      100     110     120

      120     130     140     150     160     170
Membra NVPLRGTIVTRPLMESELVIGAVIIRGHLRMAGHSLGRCDIKDLPKEITVATSRTLSYYK
      ::::::::::::::::::::::::::::::::::::::::::::::::::::::::::::::
Membra NVPLHGTILTRPLLESELVIGAVILRGHLRIAGHHLGRCDIKDLPKEITVATSRTLSYYK
      130     140     150     160     170     180

      180     190     200     210     220
Membra LGASQRVGTDSGFAAYNRYRIGNYKLNTDHAGSNDNIALLVQ
      ::::::::::. ::::::::::::::::::::::::::::::::::::::::::::::
Membra LGASQRVAGDSGFAAYSRYRIGNYKLNTDHSSSSDNIALLVQ
      190     200     210     220
```

```
>--
  Waterman-Eggert score: 43; 15.5 bits; E(1) < 0.65
  29.3% identity (46.6% similar) in 58 aa overlap (52-109:26-75)
```

```

          60          70          80          90         100
Membra FLWLLWPVTLACFVLAAYRINWVTGGIAIAMACIVGLMWLSYFVASFRLFARTRSMW
      :::: : . : : . : : . . : : .. : : : . . : : : : : : : :
Membra FLFLTW-ICLLQFAYANRNRFLYIIKLI-----FLWLLW-PVTLACFVLAAYRINW
      30          40          50          60          70

```

>--

Waterman-Eggert score: 40; 14.8 bits; E(1) < 0.83  
 27.6% identity (46.6% similar) in 58 aa overlap (25-74:53-110)

```

          30          40          50          60          70
Membra FLFLAW-IMLLQFAYSNRNRFLYIIKLV-----FLWLLW-PVTLACFVLAAYRINW
      :::: : . : : . . : : . . : : . . : : : . . : : : : : : : :
Membra FLWLLWPVTLACFVLAAYRINWITGGIAIAMACLVGLMWLSYFIASFRLFARTRSMW
      60          70          80          90          100          110

```

221 residues in 1 query sequences  
 222 residues in 1 library sequences  
 Scomplib [36.3.5e Nov, 2012(preload8)]  
 start: Sat May 9 00:33:12 2020 done: Sat May 9 00:33:12 2020  
 Total Scan time: 0.010 Total Display time: 0.010

Function used was LALIGN [36.3.5e Nov, 2012(preload8)]



# lalign output for ORF6 PROTEIN SARS COV vs. ORF6 PROTEIN SARS COV2

[EMBNET-Server] Date: Sat May 9 0:34:43 2020

```
# bin/lalign36 -E 10.0 -f -12 -g -2 5098.1.seq 5098.2.seq -J -K 3
LALIGN finds non-overlapping local alignments
  version 36.3.5e Nov, 2012(preload8)
Please cite:
  X. Huang and W. Miller (1991) Adv. Appl. Math. 12:373-381
```

```
Query: 5098.1.seq
      1>>>ORF6 Protein SARS CoV 63 bp - 63 aa
Library: 5098.2.seq
        61 residues in      1 sequences
```

```
Statistics: (shuffled [500]) MLE statistics: Lambda= 0.2023; K=0.1197
  statistics sampled from 1 (1) to 500 sequences
Threshold: E() < 10 score: 19
Algorithm: Smith-Waterman (SSE2, Michael Farrar 2006) (7.2 Nov 2010)
Parameters: BL50 matrix (15:-5), open/ext: -12/-2
Scan time: 0.000
```

```
>>ORF6 Protein SARS CoV-2 61 bp (61 aa)
  Waterman-Eggert score: 289; 87.4 bits; E(1) < 1.9e-23
68.9% identity (93.4% similar) in 61 aa overlap (1-61:1-61)
```

```
          10          20          30          40          50          60
ORF6   MFHLVDFQVTIAEILIIIIMRTFRIAIWNLDVISSIVRQLFKPLTKKNYSELDDEEPMEL
      : : : : : : : : : : : : : : : : : : : : : : : : : : : : : : : : : : : :
ORF6   MFHLVDFQVTIAEILLIIMRTFKVSIWNLDYIINLIKNLSKSLTENKYSQLDEEQPMEI
          10          20          30          40          50          60
```

```
ORF6   D
      :
ORF6   D
```

```
>--
  Waterman-Eggert score: 26; 10.6 bits; E(1) < 0.91
41.7% identity (75.0% similar) in 12 aa overlap (7-18:22-33)
```

```
          10
ORF6   FQVTIAEILIII
      : : : : .. : :
ORF6   FKVSIWNLDYII
          30
```

```
>--
  Waterman-Eggert score: 25; 10.4 bits; E(1) < 0.95
28.6% identity (71.4% similar) in 14 aa overlap (33-46:29-42)
```

```
ORF6  ISSIVRQLFKPLTK
      .. :.  ..: :.:
ORF6  LDYIINLIIKNLSK
      30      40
```

63 residues in 1 query sequences

61 residues in 1 library sequences

Scomplib [36.3.5e Nov, 2012(preload8)]

start: Sat May 9 00:34:44 2020 done: Sat May 9 00:34:44 2020

Total Scan time: 0.000 Total Display time: 0.000

Function used was LALIGN [36.3.5e Nov, 2012(preload8)]

# lalign output for ORF7A PROTEIN SARS COV vs. ORF7A PROTEIN SARS COV2

[EMBnet-Server] Date: Sat May 9 0:38:30 2020

```
# bin/lalign36 -E 10.0 -f -12 -g -2 5095.1.seq 5095.2.seq -J -K 3
LALIGN finds non-overlapping local alignments
  version 36.3.5e Nov, 2012(preload8)
Please cite:
  X. Huang and W. Miller (1991) Adv. Appl. Math. 12:373-381
```

```
Query: 5095.1.seq
      1>>>ORF7a Protein SARS CoV 122 bp - 122 aa
Library: 5095.2.seq
        121 residues in      1 sequences
```

```
Statistics: (shuffled [500]) MLE statistics: Lambda= 0.1933; K=0.06825
  statistics sampled from 1 (1) to 500 sequences
Threshold: E() < 10 score: 24
Algorithm: Smith-Waterman (SSE2, Michael Farrar 2006) (7.2 Nov 2010)
Parameters: BL50 matrix (15:-5), open/ext: -12/-2
Scan time: 0.000
```

```
>>ORF7a Protein SARS CoV-2 121 bp (121 aa)
  Waterman-Eggert score: 702; 199.6 bits; E(1) < 1.2e-56
  85.2% identity (95.9% similar) in 122 aa overlap (1-122:1-121)
```

```
          10          20          30          40          50          60
ORF7a  MKIILFLT LIVFTSCELYHYQECVRGTTVLLKEPCPSGTYEGNSPFHPLADNKFALTCTS
      :::::::::::::::::::::::::::::::::::::::::::::::::::::::::::::::
ORF7a  MKIILFLALITLATCELYHYQECVRGTTVLLKEPCSSGTYEGNSPFHPLADNKFALTCFS
          10          20          30          40          50          60

          70          80          90          100          110          120
ORF7a  THFAFACADGTRHTYQLRARSVSPKLFIRQEEVQQELYSPFLIVAAALVFLILCFTIKRK
      ::::::: :::::::::::::::::::::::::::::::::::::::::::::::::::::::
ORF7a  TQFAFACPDGVKHVYQLRARSVSPKLFIRQEEVQ-ELYSPIFLIVAAIVFITLCLTKRK
          70          80          90          100          110
```

```
ORF7a  TE
      ::
ORF7a  TE
      120
```

```
>--
  Waterman-Eggert score: 34; 13.4 bits; E(1) < 0.76
  40.0% identity (53.3% similar) in 15 aa overlap (57-71:14-27)
```

```
          60          70
ORF7a  TCTSTHFAFACADGT
      ::  .  .  ::
ORF7a  TCELYHYQ-ECVRGT
          20
```

>--

Waterman-Eggert score: 31; 12.5 bits; E(1) < 0.92  
34.8% identity (52.2% similar) in 23 aa overlap (96-118:41-62)

```
          100          110
ORF7a  ELYSPLFLIVAALVFLILCFTIK
       :  ::  :  ::  :  .  ::  .
ORF7a  EGNSP-FHPLADNKFALTCFSTQ
              50              60
```

122 residues in 1 query sequences

121 residues in 1 library sequences

Scomplib [36.3.5e Nov, 2012(preload8)]

start: Sat May 9 00:38:30 2020 done: Sat May 9 00:38:30 2020

Total Scan time: 0.000 Total Display time: 0.010

Function used was LALIGN [36.3.5e Nov, 2012(preload8)]

# lalign output for ORF7B PROTEIN SARS COV vs. ORF7B PROTEIN SARS COV2

[EMBNET-Server] Date: Sat May 9 13:48:05 2020

---

```
# bin/lalign36 -E 10.0 -f -12 -g -2 13128.1.seq 13128.2.seq -J -K 3
LALIGN finds non-overlapping local alignments
  version 36.3.5e Nov, 2012(preload8)
Please cite:
  X. Huang and W. Miller (1991) Adv. Appl. Math. 12:373-381
```

```
Query: 13128.1.seq
      1>>>ORF7b Protein SARS CoV 44 bp - 44 aa
Library: 13128.2.seq
        43 residues in      1 sequences
```

```
Statistics: (shuffled [500]) MLE statistics: Lambda= 0.1541; K=0.2688
  statistics sampled from 1 (1) to 500 sequences
Threshold: E() < 10 score: 25
Algorithm: Smith-Waterman (SSE2, Michael Farrar 2006) (7.2 Nov 2010)
Parameters: BL50 matrix (15:-5), open/ext: -12/-2
Scan time: 0.000
```

```
>>ORF7b Protein SARS CoV-2 43 bp (43 aa)
  Waterman-Eggert score: 234; 53.9 bits; E(1) < 1.1e-13
  85.4% identity (92.7% similar) in 41 aa overlap (1-41:1-41)
```

```
           10          20          30          40
ORF7b  MNELTLIDFYLCFLAFLLLFLVLIMLIIFWFSLEIQDLEEPC
      : : : : : : : : : : : : : : : : : : : : : : : :
ORF7b  MIELSLIDFYLCFLAFLLLFLVLIMLIIFWFSLELQDHNETC
           10          20          30          40
```

```
>--
  Waterman-Eggert score: 50; 13.0 bits; E(1) < 0.2
  43.8% identity (87.5% similar) in 16 aa overlap (13-28:10-25)
```

```
           20
ORF7b  FLAFLLLFLVLIMLIIF
      : : : : : : : : : :
ORF7b  YLCFLAFLLLFLVLIML
      10          20
```

```
>--
  Waterman-Eggert score: 50; 13.0 bits; E(1) < 0.2
  43.8% identity (87.5% similar) in 16 aa overlap (10-25:13-28)
```

```
           10          20
ORF7b  YLCFLAFLLLFLVLIML
      : : : : : : : : : :
ORF7b  FLAFLLLFLVLIMLIIF
           20
```

44 residues in 1 query sequences  
43 residues in 1 library sequences  
Scomplib [36.3.5e Nov, 2012(preload8)]  
start: Sat May 9 13:48:06 2020 done: Sat May 9 13:48:06 2020  
Total Scan time: 0.000 Total Display time: 0.000

Function used was LALIGN [36.3.5e Nov, 2012(preload8)]

Readseq version 2.1.30 (12-May-2010) Readseq version 2.1.30 (12-May-2010)

## lalign output for ORF8A PROTEIN SARS COV vs. ORF8B PROTEIN SARS COV

[EMBnet-Server] Date: Sat May 9 13:50:16 2020

---

```
# bin/lalign36 -E 10.0 -f -12 -g -2 14140.1.seq 14140.2.seq -J -K 3
LALIGN finds non-overlapping local alignments
  version 36.3.5e Nov, 2012(preload8)
Please cite:
  X. Huang and W. Miller (1991) Adv. Appl. Math. 12:373-381
```

```
Query: 14140.1.seq
      1>>>ORF8a Protein SARS CoV 39 bp - 39 aa
Library: 14140.2.seq
        84 residues in      1 sequences
```

```
Statistics: (shuffled [500]) MLE statistics: Lambda= 0.2308; K=0.1984
  statistics sampled from 1 (1) to 500 sequences
Threshold: E() < 10 score: 18
Algorithm: Smith-Waterman (SSE2, Michael Farrar 2006) (7.2 Nov 2010)
Parameters: BL50 matrix (15:-5), open/ext: -12/-2
Scan time: 0.000
```

```
>>ORF8b Protein SARS CoV 84 bp (84 aa)
  Waterman-Eggert score: 43; 16.7 bits; E(1) < 0.031
41.2% identity (58.8% similar) in 17 aa overlap (18-34:35-51)
```

```
      20      30
ORF8a TVVQRCASNKPHVLEDP
      ::: .. :   :::
ORF8b TMVQTCTPNVTINCQDP
      40      50
```

```
>--
  Waterman-Eggert score: 29; 12.0 bits; E(1) < 0.55
23.1% identity (42.3% similar) in 26 aa overlap (14-39:39-64)
```

```
      20      30
ORF8a SCICTVVQRCASNKPHVLEDPCKVQH
      .: ... : .   .: :   :
ORF8b TCTPNVTINCQDPAGGALIARCWYLH
      40      50      60
```

```
>--
  Waterman-Eggert score: 27; 11.3 bits; E(1) < 0.72
15.0% identity (60.0% similar) in 20 aa overlap (16-35:21-40)
```

```
      20      30
ORF8a ICTVVQRCASNKPHVLEDP
      :... .   .. :... :
ORF8b LCALGKVLPFHRWHTMVQTC
```

39 residues in 1 query sequences  
84 residues in 1 library sequences  
Scomplib [36.3.5e Nov, 2012(preload8)]  
start: Sat May 9 13:50:17 2020 done: Sat May 9 13:50:17 2020  
Total Scan time: 0.000 Total Display time: 0.000

Function used was LALIGN [36.3.5e Nov, 2012(preload8)]



Readseq version 2.1.30 (12-May-2010) Readseq version 2.1.30 (12-May-2010)

## lalign output for ORF8A PROTEIN SARS COV vs. ORF8 PROTEIN SARS COV2

[EMBnet-Server] Date: Sat May 9 13:51:34 2020

---

```
# bin/lalign36 -E 10.0 -f -12 -g -2 7581.1.seq 7581.2.seq -J -K 3
LALIGN finds non-overlapping local alignments
version 36.3.5e Nov, 2012(preload8)
Please cite:
X. Huang and W. Miller (1991) Adv. Appl. Math. 12:373-381
```

```
Query: 7581.1.seq
      1>>>ORF8a Protein SARS CoV 39 bp - 39 aa
Library: 7581.2.seq
        121 residues in      1 sequences
```

```
Statistics: (shuffled [500]) MLE statistics: Lambda= 0.1895; K=0.08093
statistics sampled from 1 (1) to 500 sequences
Threshold: E() < 10 score: 19
Algorithm: Smith-Waterman (SSE2, Michael Farrar 2006) (7.2 Nov 2010)
Parameters: BL50 matrix (15:-5), open/ext: -12/-2
Scan time: 0.000
```

```
>>ORF8 Protein SARS CoV-2 121 bp (121 aa)
Waterman-Eggert score: 89; 28.0 bits; E(1) < 1.8e-05
31.7% identity (70.7% similar) in 41 aa overlap (1-38:1-40)
```

```
                10          20          30
ORF8a  MKLLIVLTCISLCS---CTVVQRCASNKPHVLEDPCVKVQ
      ..: .: .: .: .: .: .: .: .: .: .: .: .: .: .: .: .: .: .:
ORF8   MKFLVFLGIITTVAAFHQECSL-QSCTQHQPYPVDDPCPIH
                10          20          30          40
```

```
>--
Waterman-Eggert score: 26; 10.7 bits; E(1) < 0.94
42.9% identity (85.7% similar) in 7 aa overlap (18-24:97-103)
```

```
                20
ORF8a  TVVQRCA
      ..: :..
ORF8   SLVVRCS
                100
```

```
>--
Waterman-Eggert score: 25; 10.5 bits; E(1) < 0.96
16.7% identity (66.7% similar) in 18 aa overlap (7-24:4-21)
```

```
                10          20
ORF8a  LTCISLCSICTVVQRCA
      .. .: .: .: .: .: .: .:
ORF8   LVFLGIITTVAAFHQECS
```

39 residues in 1 query sequences  
121 residues in 1 library sequences  
Scomplib [36.3.5e Nov, 2012(preload8)]  
start: Sat May 9 13:51:35 2020 done: Sat May 9 13:51:35 2020  
Total Scan time: 0.000 Total Display time: 0.000

Function used was LALIGN [36.3.5e Nov, 2012(preload8)]

Readseq version 2.1.30 (12-May-2010) Readseq version 2.1.30 (12-May-2010)

## lalign output for ORF8B PROTEIN SARS COV vs. ORF8 PROTEIN SARS COV2

[EMBnet-Server] Date: Sat May 9 13:54:25 2020

---

```
# bin/lalign36 -E 10.0 -f -12 -g -2 14902.1.seq 14902.2.seq -J -K 3
LALIGN finds non-overlapping local alignments
  version 36.3.5e Nov, 2012(preload8)
Please cite:
  X. Huang and W. Miller (1991) Adv. Appl. Math. 12:373-381
```

```
Query: 14902.1.seq
      1>>>ORF8b Protein SARS CoV 84 bp - 84 aa
Library: 14902.2.seq
        121 residues in      1 sequences
```

```
Statistics: (shuffled [500]) MLE statistics: Lambda= 0.2293; K=0.1147
  statistics sampled from 1 (1) to 500 sequences
Threshold: E() < 10 score: 21
Algorithm: Smith-Waterman (SSE2, Michael Farrar 2006) (7.2 Nov 2010)
Parameters: BL50 matrix (15:-5), open/ext: -12/-2
Scan time: 0.000
```

```
>>ORF8 Protein SARS CoV-2 121 bp (121 aa)
  Waterman-Eggert score: 100; 36.2 bits; E(1) < 1.3e-07
40.5% identity (66.7% similar) in 42 aa overlap (39-80:82-119)
```

```
      40      50      60      70      80
ORF8b TCTPNVTINCQDPAGGALIARCWYLHEGHQTAAFRDVLVVLN
      . . . . . : : : : : . . . . .
ORF8  SCLP-FTINCQEPKLGSLVVRCSFYED---FLEYHDVRRVLD
      90      100      110
```

```
>--
  Waterman-Eggert score: 58; 22.3 bits; E(1) < 0.002
24.5% identity (54.7% similar) in 53 aa overlap (19-71:5-55)
```

```
      20      30      40      50      60      70
ORF8b AWLALCALGKVLFPFHRWHTMVQTCTPNVTINCQDPAGGALIARCWYLHEGHQTA
      . . . : : . . : : . . . . . : : . . : : . . .
ORF8  VFLGIITTVAAFHQECSL-QSCTQHQPYYVDDPCPIHFYSK-WYIRVGARKSA
      10      20      30      40      50
```

```
>--
  Waterman-Eggert score: 35; 14.7 bits; E(1) < 0.32
26.9% identity (53.8% similar) in 26 aa overlap (30-53:42-66)
```

```
      30      40      50
ORF8b FHRWHTMV--QTCTPNVTINCQDPAG
      . . . : . : . . : : :
ORF8  YSKWYIRVGARKSAPLIEL-CVDEAG
```

84 residues in 1 query sequences  
121 residues in 1 library sequences  
Scomplib [36.3.5e Nov, 2012(preload8)]  
start: Sat May 9 13:54:26 2020 done: Sat May 9 13:54:26 2020  
Total Scan time: 0.000 Total Display time: 0.010

Function used was LALIGN [36.3.5e Nov, 2012(preload8)]

Readseq version 2.1.30 (12-May-2010) Readseq version 2.1.30 (12-May-2010)

## lalign output for N PROTEIN SARS COV vs. N PROTEIN SARS COV2

[EMBnet-Server] Date: Sat May 9 14:11:12 2020

```
# bin/lalign36 -E 10.0 -f -12 -g -2 6576.1.seq 6576.2.seq -J -K 3
LALIGN finds non-overlapping local alignments
version 36.3.5e Nov, 2012(preload8)
Please cite:
X. Huang and W. Miller (1991) Adv. Appl. Math. 12:373-381
```

```
Query: 6576.1.seq
1>>>N Protein SARS CoV 422 bp - 422 aa
Library: 6576.2.seq
419 residues in 1 sequences
```

```
Statistics: (shuffled [500]) MLE statistics: Lambda= 0.1088; K=0.009123
statistics sampled from 1 (1) to 500 sequences
Threshold: E() < 10 score: 47
Algorithm: Smith-Waterman (SSE2, Michael Farrar 2006) (7.2 Nov 2010)
Parameters: BL50 matrix (15:-5), open/ext: -12/-2
Scan time: 0.040
```

```
>>>N Protein SARS CoV-2 419 bp (419 aa)
Waterman-Eggert score: 2573; 410.8 bits; E(1) < 3.8e-119
90.5% identity (97.2% similar) in 422 aa overlap (1-422:1-419)
```

```

      10      20      30      40      50      60
N   MSDNGPQSNQRSAPRITFGGPTDSTDNNGNGGRNGARPKQRRPQGLPNNTASWFTALTQH
      :::::  :::::::::::::::  ::::  ::::  :::::::::::::::
N   MSDNGPQ-NQRNAPRITFGGPSDSTGSNQNGERSGARSKQRRPQGLPNNTASWFTALTQH
      10      20      30      40      50
      70      80      90     100     110     120
N   GKEELRFPRGQGVPIINTNSGPDDQIGYRRATRVRGGDGKMKELSPRWYFYLLGTGPEA
      :::::::::::::::
N   GKEDLKFPRGQGVPIINTNSPDDQIGYRRATRIRGGDGKMKDLSPRWYFYLLGTGPEA
      60      70      80      90     100     110
      130     140     150     160     170     180
N   SLPYGANKEGIVVATEGALNTPKDHIGTRNPNNAATVLQLPQGTTLPKGFYAEGSRGG
      :::::::::::::::
N   GLPYGANKDGIIVVATEGALNTPKDHIGTRNPANNAIIVLQLPQGTTLPKGFYAEGSRGG
      120     130     140     150     160     170
      190     200     210     220     230     240
N   SQASSRSSSRSRGNSRNSTPGSSRGNSPARMASGGGETALALLLLDRLNQLESKVSQKGGQ
      :::::::::::::::
N   SQASSRSSSRSRNSSRNSTPGSSRGTSPARMAGNGGDAALALLLLDRLNQLESKMSGKGGQ
      180     190     200     210     220     230
      250     260     270     280     290     300
N   QQQGQTVTKKSAEASKKPRQKRTATKQYNVTQAFGRRGPEQTQGNFGDQDLIRQGTDYK
```

```

      .....
N   QQQGQTVTKKSAAEASKKPRQKRTATKAYNVTQAFGRRGPEQTQGNFGDQELIRQGTDYK
    240      250      260      270      280      290

      310      320      330      340      350      360
N   HWPQIAQFAPSASAFFGMSRIGMEVTPSGTWLTYHGAIKLDDKDPQFKDNVILLNKHIDA
      .....
N   HWPQIAQFAPSASAFFGMSRIGMEVTPSGTWLTYTGAIKLDDKDPNFKDQVILLNKHIDA
    300      310      320      330      340      350

      370      380      390      400      410      420
N   YKTFPPTPEPKKDKKKKTDEAQPLPQRQKKQPTVTLLPAADMDDFSRQLQNSMSGASADST
      .....
N   YKTFPPTPEPKKDKKKKADEQALPQRQKKQPTVTLLPAADLDDFSKQLQQSMS--SADST
    360      370      380      390      400      410

N   QA
      ::
N   QA

```

```

>--
Waterman-Eggert score: 97; 22.0 bits; E(1) < 0.041
32.6% identity (61.8% similar) in 89 aa overlap (180-266:175-263)

```

```

    180      190      200      210      220      230
N   GSQASSRSSRSRGNSSRNSTPGSSRGNSPARM-ASGGGETALALLLLDRLNQLESKVS-
      .....
N   GSRGGSQASSRSSRSRNSRNSTPGSSRGTS ParmAGNGGDAALALLLLDRLNQLESKM
    180      190      200      210      220      230

    240      250      260
N   KGQQQQGQTVTKKSAAEASKKPRQKRTAT
      ... :: : : . . : . . . :
N   SGKGQQQQGQTVTKKSAAEASKKPRQKRT
    240      250      260

```

```

>--
Waterman-Eggert score: 90; 20.9 bits; E(1) < 0.086
31.9% identity (58.5% similar) in 94 aa overlap (176-264:179-265)

```

```

    180      190      200      210      220      230
N   GSRGGSQASSRSSRSR----GNSRNSTPGSSRGNS ParmASGGGETALALL-LLDRLNQ
      .....
N   GSQASSRSSRSRNSRNSTPGSSRGTS ParmAGNG-----GDAALALLLLDRLNQLES
    180      190      200      210      220      230

    240      250      260
N   LESKVSQSGKGQQQQGQTVTKKSAAEASKKPRQKRT
      : ... :: : : . . : . . . :
N   KMSG-KGQQQQGQTVTKKSAAEASKKPRQKRTAT
    240      250      260

```

422 residues in 1 query sequences

419 residues in 1 library sequences  
Scomplib [36.3.5e Nov, 2012(preload8)]  
start: Sat May 9 14:11:13 2020 done: Sat May 9 14:11:13 2020  
Total Scan time: 0.040 Total Display time: 0.050

Function used was LALIGN [36.3.5e Nov, 2012(preload8)]

Readseq version 2.1.30 (12-May-2010) Readseq version 2.1.30 (12-May-2010)

## lalign output for ORF9B SARS COV vs. ORF10 SARS COV2

[EMBnet-Server] Date: Sat May 9 14:20:14 2020

---

```
# bin/lalign36 -E 10.0 -f -12 -g -2 7581.1.seq 7581.2.seq -J -K 3
LALIGN finds non-overlapping local alignments
version 36.3.5e Nov, 2012(preload8)
```

Please cite:

X. Huang and W. Miller (1991) Adv. Appl. Math. 12:373-381

Query: 7581.1.seq

1>>>ORF9b SARS CoV 98 bp - 98 aa

Library: 7581.2.seq

38 residues in 1 sequences

Statistics: (shuffled [500]) MLE statistics: Lambda= 0.2834; K=0.1474  
statistics sampled from 1 (1) to 500 sequences

Threshold: E() < 10 score: 14

Algorithm: Smith-Waterman (SSE2, Michael Farrar 2006) (7.2 Nov 2010)

Parameters: BL50 matrix (15:-5), open/ext: -12/-2

Scan time: 0.000

>>ORF10 SARS CoV-2 38 bp (38 aa)

Waterman-Eggert score: 25; 13.0 bits; E(1) < 0.37

28.6% identity (52.4% similar) in 21 aa overlap (41-61:5-25)

```
          50      60
ORF9b  KVYP IILRLGSQLSLSMARRN
      . . . . . : : : :
ORF10  NVFAFPFTIYSLLLCRMNSRN
          10      20
```

>--

Waterman-Eggert score: 22; 11.8 bits; E(1) < 0.66

33.3% identity (83.3% similar) in 12 aa overlap (42-52:13-24)

```
          50
ORF9b  VYPIIL-RLGSQ
      . : . : . : . :
ORF10  IYSLLLCRMNSR
          20
```

>--

Waterman-Eggert score: 21; 11.3 bits; E(1) < 0.76

50.0% identity (62.5% similar) in 8 aa overlap (54-61:15-22)

```
          60
ORF9b  SLSMARRN
      : : . : :
ORF10  SLLLCRMN
          20
```



98 residues in 1 query sequences  
38 residues in 1 library sequences  
Scomplib [36.3.5e Nov, 2012(preload8)]  
start: Sat May 9 14:20:15 2020 done: Sat May 9 14:20:15 2020  
Total Scan time: 0.000 Total Display time: 0.000

Function used was LALIGN [36.3.5e Nov, 2012(preload8)]

Readseq version 2.1.30 (12-May-2010) Readseq version 2.1.30 (12-May-2010)

## lalign output for ORF3B SARS COV vs. ORF3B SARS COV2

[EMBNET-Server] Date: Fri May 22 16:18:17 2020

---

```
# bin/lalign36 -E 10.0 -f -12 -g -2 21903.1.seq 21903.2.seq -J -K 3
LALIGN finds non-overlapping local alignments
  version 36.3.5e Nov, 2012(preload8)
Please cite:
  X. Huang and W. Miller (1991) Adv. Appl. Math. 12:373-381
```

```
Query: 21903.1.seq
  1>>>ORF3b SARS CoV 154 bp - 154 aa
Library: 21903.2.seq
  57 residues in      1 sequences
```

```
Statistics: (shuffled [500]) MLE statistics: Lambda= 0.1928; K=0.06395
  statistics sampled from 1 (1) to 500 sequences
Threshold: E() < 10 score: 21
Algorithm: Smith-Waterman (SSE2, Michael Farrar 2006) (7.2 Nov 2010)
Parameters: BL50 matrix (15:-5), open/ext: -12/-2
Scan time: 0.000
```

```
>>ORF3b SARS CoV-2 57 bp (57 aa)
  Waterman-Eggert score: 32; 12.9 bits; E(1) < 0.69
26.5% identity (50.0% similar) in 34 aa overlap (102-134:3-36)
```

```
          110      120      130
ORF3b  MCKYTQSTALQELLIQQWIQFMMSRRRLLAC-LC
      .:  :  .:. . . . :  :.  :  :.  :.
ORF3b  YCWRCTSCCFSERFQNHNPQKEMATSTLQGCSLC
          10      20      30
```

```
>--
  Waterman-Eggert score: 31; 12.6 bits; E(1) < 0.76
50.0% identity (87.5% similar) in 8 aa overlap (35-42:16-23)
```

```
          40
ORF3b  FQHQNSKK
      :.:. .:
ORF3b  FQNHNPQK
          20
```

```
>--
  Waterman-Eggert score: 26; 11.2 bits; E(1) < 0.98
21.7% identity (56.5% similar) in 23 aa overlap (90-112:9-31)
```

```
          90      100      110
ORF3b  SSSLTSLKTHRMCKYTQSTALQ
      :  . . . . :  :  . . . . :
ORF3b  SCCFSERFQNHNPQKEMATSTLQ
          10      20      30
```

154 residues in 1 query sequences  
57 residues in 1 library sequences  
Scomplib [36.3.5e Nov, 2012(preload8)]  
start: Fri May 22 16:18:17 2020 done: Fri May 22 16:18:17 2020  
Total Scan time: 0.000 Total Display time: 0.000  
  
Function used was LALIGN [36.3.5e Nov, 2012(preload8)]

Readseq version 2.1.30 (12-May-2010) Readseq version 2.1.30 (12-May-2010)

## lalign output for ORF14 SARS COV vs. ORF14 SARS COV2

[EMBnet-Server] Date: Thu May 21 14:42:09 2020

```
# bin/lalign36 -E 10.0 -f -12 -g -2 29912.1.seq 29912.2.seq -J -K 3
LALIGN finds non-overlapping local alignments
version 36.3.5e Nov, 2012(preload8)
Please cite:
```

X. Huang and W. Miller (1991) Adv. Appl. Math. 12:373-381

```
Query: 29912.1.seq
      1>>>ORF14 SARS CoV 70 bp - 70 aa
Library: 29912.2.seq
        73 residues in      1 sequences
```

```
Statistics: (shuffled [500]) MLE statistics: Lambda= 0.2080; K=0.1528
statistics sampled from 1 (1) to 500 sequences
Threshold: E() < 10 score: 21
Algorithm: Smith-Waterman (SSE2, Michael Farrar 2006) (7.2 Nov 2010)
Parameters: BL50 matrix (15:-5), open/ext: -12/-2
Scan time: 0.000
```

```
>>ORF14 SARS CoV-2 73 bp (73 aa)
Waterman-Eggert score: 353; 108.6 bits; E(1) < 1e-29
77.1% identity (85.7% similar) in 70 aa overlap (1-70:1-70)
```

```
          10          20          30          40          50          60
ORF14  MLPPCYNFLKEQHCQKASTQREAEAAVKPLLAPHHVVAVIQEIQLLAAVGEILLLEWLAE
      ::  ::::::::::::::::::::  ::::::::::::::::::::  ::::::::::::::::::::
ORF14  MLQSCYNFLKEQHCQKASTQKGAEEAAVKPLLVPHHVVATVQEIQLQAAVGELLLEWLAM
          10          20          30          40          50          60

          70
ORF14  VVKLPSRYCC
      .. :  ::
ORF14  AVMLLLLCCC
          70
```

```
>--
Waterman-Eggert score: 34; 12.9 bits; E(1) < 0.48
22.6% identity (50.9% similar) in 53 aa overlap (12-64:3-55)
```

```
          20          30          40          50          60
ORF14  QHCQKASTQREAEAAVKPLLAPHHVVAVIQEIQLLAAVGEILLLEWLAEVVKL
      : : .  ... . :  :  : ..  ..... : : :  ..... :
ORF14  QSCYNFLKEQHCQKASTQKGAEEAAVKPLLVPHHVVATVQEIQLQAAVGELLLE
          10          20          30          40          50
```

```
>--
Waterman-Eggert score: 27; 10.8 bits; E(1) < 0.94
```

29.2% identity (54.2% similar) in 24 aa overlap (8-31:30-53)

```
      10      20      30
ORF14  FLKEQHCQKASTQREAEAAVKPLL
      .: .: . . .: : :
ORF14  LLVPHHVVATVQEIQQAQAVGELL
      30      40      50
```

70 residues in 1 query sequences

73 residues in 1 library sequences

Scomplib [36.3.5e Nov, 2012(preload8)]

start: Thu May 21 14:42:10 2020 done: Thu May 21 14:42:10 2020

Total Scan time: 0.000 Total Display time: 0.000

Function used was LALIGN [36.3.5e Nov, 2012(preload8)]
